1 **Reconciling persistent and dynamic hypotheses of working**  
2 **memory coding in prefrontal cortex**

3

4

5 **Cavanagh SE<sup>1</sup>, Towers JP<sup>1</sup>, Wallis JD<sup>2,3</sup>, Hunt LT<sup>1,4,5</sup>,**  
6 **Kennerley SW<sup>1,2,3</sup>**

7

8 1Sobell Department of Motor Neuroscience, University  
9 College London, London, United Kingdom;

10 2Department of Psychology, University of California,  
11 Berkeley, Berkeley, United States;

12 3Helen Wills Neuroscience Institute, University of California,  
13 Berkeley, Berkeley, United States;

14 4 Max Planck-UCL Centre for Computational Psychiatry and  
15 Aging, University College London, London, United Kingdom

16 5 Wellcome Centre for Integrative Neuroimaging,  
17 Department of Psychiatry, University of Oxford, Oxford,  
18 United Kingdom

19

20

21

22

## 23 **Abstract**

24 Competing accounts propose that working memory (WM) is subserved either by persistent activity in  
25 single neurons or by dynamic (time-varying) activity across a neural population. Here we compare  
26 these hypotheses across four regions of prefrontal cortex (PFC) in a spatial WM task, where an  
27 intervening distractor indicated the reward available for a correct saccade. WM representations  
28 were strongest in ventrolateral PFC (VLPFC) neurons with higher intrinsic temporal stability (time-  
29 constant). At the population-level, although a stable mnemonic state was reached during the delay,  
30 this tuning geometry was reversed relative to cue-period selectivity, and was disrupted by the  
31 distractor. Single-neuron analysis revealed many neurons switched to coding reward, rather than  
32 maintaining task-relevant spatial selectivity until saccade. These results imply WM is fulfilled by  
33 dynamic, population-level activity within high time-constant neurons. Rather than persistent activity  
34 supporting stable mnemonic representations that bridge distraction, PFC neurons may stabilise a  
35 dynamic population-level process that supports WM.

36

37

38 Temporary maintenance of relevant information in the absence of direct sensory input is a crucial  
39 component of working memory (WM). The neuronal basis of WM has been studied extensively  
40 through single-neuron recordings. These typically involve non-human primates performing tasks  
41 where a transient sensory stimulus must be remembered across a several second delay before a  
42 probe cues a response to the remembered stimulus. A consensus has developed from these  
43 experiments<sup>1-3</sup>, and from lesion studies<sup>4,5</sup>, that cognitive operations that use information in WM  
44 depend upon the prefrontal cortex (PFC)<sup>6</sup>, with individual PFC neurons sustaining stimulus-specific  
45 representations across the mnemonic delay. This *stable coding* has inspired biophysically plausible  
46 attractor network models of working memory, in which persistent activity is facilitated by a  
47 neocortical circuit structured with strong recurrent connections between similarly tuned neurons<sup>7</sup>.

48 Recent findings have challenged these established views. Responses of PFC neurons are often highly  
49 heterogeneous, with only a minority exhibiting prolonged stimulus-specific encoding during a delay<sup>8-</sup>  
50<sup>12</sup>. The majority of neurons instead show short-lived selectivity, with variable onset latencies and  
51 durations. This pattern of working memory activity is referred to as *dynamic coding*. Evidence for  
52 dynamic coding has led to revised attractor models that reconcile time-varying and stable single  
53 neuron responses<sup>13</sup>. It has also inspired alternate explanations for how WM may be achieved  
54 without relying upon a stable representation in the form of persistent spiking activity<sup>8,14-18</sup>. These  
55 include *dynamic trajectory* models where neural firing preserves a representation of the mnemonic  
56 stimulus throughout a delay by moving through a reproducible path of activity<sup>15,17,18</sup>. They also  
57 include *synaptic* models where WM is achieved by short-term plasticity of synaptic weights<sup>8,14</sup>. In the  
58 latter, stable delay-period WM correlates still arise, but as a by-product of spontaneous activity  
59 within a circuit that is temporarily embedded with mnemonic information.

60 An important prediction rarely tested in the context of WM models relates to how network  
61 representations of stimuli resist distraction<sup>19-21</sup>. In a world where we are constantly exposed to  
62 salient sensory stimuli, efficient cognitive operations that depend on WM require that this  
63 information is resistant to distractions in our environment. The majority of task designs used to  
64 study single-neuron WM-correlates lack intervening stimuli during delays. If memoranda are  
65 maintained purely by persistent single neuron activity, and if those neurons flexibly encode multiple  
66 task features (as is common in PFC<sup>22-27</sup>), a distracting stimulus could disrupt the attractor state and  
67 cause the memory to be distorted or lost. Several neurophysiological accounts suggest PFC  
68 possesses a privileged position in cortical processing – the ability for individual task-selective  
69 neurons to resist distraction<sup>28-30</sup>. More recently, however, the view that PFC neurons are resistant to  
70 distractors has been challenged<sup>21,31</sup>. If WM is maintained in the absence of stable single-neuron  
71 representations, it becomes important to understand how memoranda are encoded across the PFC  
72 population in the face of distraction, and what role neurons with persistent activity play in such  
73 population-level encoding.

74 One factor worth considering is that single neurons exhibit considerable heterogeneity in the degree  
75 to which they exhibit persistent activity at rest<sup>32,33</sup>. By fitting an exponential decay to the  
76 autocorrelation of neuronal firing outside of the task, it is possible to characterise individual  
77 neurons' intrinsic temporal stability (time constant)<sup>33,34</sup>. A neuron's time constant likely reflects a  
78 combination of its intrinsic physical properties and its degree of recurrent connectivity<sup>35</sup>. Because  
79 neurons with higher time constants were more likely to be maintain information during extended  
80 cognitive processes such as decision-making<sup>33</sup>, we hypothesised that heterogeneity in single-neuron

81 time constants may explain why some neurons retain stimulus-specific mnemonic representations  
82 over a delay, whereas others exhibit more transient selectivity. This would reconcile persistent and  
83 dynamic WM coding. If attractor states underlie WM, classical stable mnemonic representations  
84 should primarily be evident in a subpopulation of neurons with high time constants. Furthermore,  
85 neurons with high time constants may facilitate the stability of WM representations throughout  
86 distraction.

87 We tested these hypotheses in a spatial WM task where a stimulus revealing the reward for a  
88 correct response was presented either before or after the spatial WM cue. Presentation after the  
89 mnemonic cue serves as a salient distractor, potentially disrupting spatial WM representations<sup>36,37</sup>.  
90 This also allowed us to test how an interfering stimulus affected network-level mnemonic coding as  
91 a function of neuronal time constant.

92

## 93 **Results**

### 94 **Task and Neurophysiological Recordings**

95 Two rhesus macaques (*Macaca mulatta*) performed a spatial working memory task where the  
96 reward amount for successful responses varied across trials (**Fig1a**)<sup>36,37</sup>. Briefly (see **Methods**),  
97 subjects were first required to fixate a central cue for 1000ms. If fixation was maintained, two cues  
98 were sequentially presented (for 500ms apiece), each followed by a 1000ms delay. The spatial cue  
99 indicated which of 24 locations the subject had to hold in working memory (the mnemonic stimulus);  
100 the reward cue indicated which of 5 reward magnitudes the subject would receive for a saccade to  
101 the remembered location. The subject could elicit a saccade to the remembered location following a  
102 go cue. In “RS trials”, the first and second cues were the reward and spatial cues respectively; the  
103 cue order was reversed in “SR trials”. We counterbalanced all spatial positions and reward levels,  
104 and the two trial types were randomly intermingled. As only the spatial cue was relevant for correct  
105 performance, the reward cue on SR trials may serve as a distracting stimulus, interfering with the  
106 stability of spatial working memory representations.

107 Single neurons were recorded from four brain regions across prefrontal cortex (PFC; **Fig1b**): anterior  
108 cingulate cortex (ACC; areas 9m, 24c, n= 198), dorsolateral PFC (DLPFC; areas 9, 9/46d, n= 209),  
109 ventrolateral PFC (VLPFC; areas 9/46v, 45A, n= 206) and orbitofrontal cortex (OFC; areas 11, 13, n=  
110 152). Histological reconstruction of recording locations is reported elsewhere<sup>36,37</sup>. All neurons per  
111 region were pooled across sessions to form “pseudopopulations” in order to examine population-  
112 level activity<sup>12,13,38</sup>. Importantly, neurons were not pre-screened for functional properties prior to  
113 recordings, facilitating an unbiased examination of population coding-dynamics and single-neuron  
114 resting time constant measures.

### 115 **Resting time constants**

116 We first sought to define each neuron’s resting time constant (“tau”) by fitting an exponential decay  
117 to its spike-count autocorrelation during the 1000ms fixation period<sup>33</sup>. The autocorrelation functions  
118 of those neurons that could successfully be described<sup>34</sup> by an exponential decay with an offset<sup>34</sup> were  
119 fitted to yield a resting time constant for each neuron (409 of 765 single neurons, see **Methods**).

120 As previously reported<sup>33</sup>, there was marked heterogeneity in the temporal specialisation of  
121 individual neurons both within and between PFC regions (**Fig1c**). Time constants differed  
122 significantly across areas (Kruskal-Wallis test,  $p=2.21 \times 10^{-6}$ ), where the highest taus were within the  
123 ACC population (Mann-Witney U Tests; ACC v DLPFC,  $4.51 \times 10^{-7}$ ; ACC v OFC,  $2.48 \times 10^{-5}$ ; ACC v  
124 VLPFC,  $7.58 \times 10^{-6}$ ). We next characterised the population-level taus of the four PFC brain regions  
125 (**Fig1d**, see **Methods**). For this analysis, data from all recorded neurons within each brain area was  
126 fitted using the same exponential decay equation. This approach has previously shown a hierarchy of  
127 temporal specialisations exists across cortex<sup>34</sup>. Our results were consistent with this, again  
128 emphasising the distinction of ACC at the summit of a hierarchy across PFC regions<sup>33,34</sup>.

### 129 **Decoding analysis of Working Memory Activity**

130 We next applied a multivariate decoding approach to investigate population-dynamics across PFC<sup>38</sup>.  
131 Briefly, this involved calculating the average single-neuron firing rate for each condition (8 collapsed  
132 locations for Space; 5 Reward levels; see **Methods**) within two independent halves of the data  
133 (training and test sets). The difference in mean activity between each pair of conditions was  
134 calculated within each set (e.g. 28 pairwise differences for Space, 10 pairwise differences for  
135 Reward). For all neurons within each regional pseudopopulation, each pairwise conditional  
136 difference was correlated between the training and test sets to quantify how well each PFC region's  
137 activity discriminated between the different conditions.

138 Our results provide the most complete comparison to date of population-level WM activity patterns  
139 across multiple PFC brain regions (**Fig2**). Of the four PFC regions examined, VLPFC activity best  
140 discriminated between both the different spatial locations and the different reward sizes regardless  
141 of trial (SR, RS) type, and it was the only PFC region that sustained these selectivity patterns across  
142 delays. VLPFC was also the PFC region most strongly discriminating spatial information immediately  
143 prior to saccade. However, VLPFC activity exhibited a distinct temporal profile. On the SR task,  
144 spatial information was strongly represented during both the spatial cue and the first delay (**Fig2a**;  
145 Spatial cue and Delay One,  $p < 0.0001$ ; cluster-based permutation tests). Importantly, shortly after  
146 the reward cue was presented in SR trials, the VLPFC spatial discriminability was dramatically  
147 reduced (**Fig2a**, Delay Two). Instead, a robust representation of reward emerged which was  
148 maintained through to the end of the trial (**Fig2b**; Reward cue through end of trial,  $p < 0.0001$ ;  
149 cluster-based permutation tests). This strong reward representation, seemingly at the expense of  
150 the spatial WM representation, was noteworthy, as retaining a memory of the spatial location is the  
151 key task variable necessary for correct performance. A similar pattern of selectivity switching was  
152 present in RS trials, where the VLPFC population initially maintained a representation of the  
153 expected reward, but this representation attenuated as the spatial representation strongly emerged  
154 following the spatial cue (**Fig2c**, Spatial cue and Delay Two,  $p < 0.0001$ ; **Fig2d**, Reward cue and Delay  
155 One,  $p < 0.0001$ ; cluster-based permutation tests). These results are consistent with VLPFC spiking-  
156 activity prioritising a representation of the most recently attended information, regardless of  
157 whether it is necessary to store the stimulus in working memory for successful performance<sup>39,40</sup>.

158 Maintenance of spatial discriminability in DLPFC was weak, emerging relatively late in the spatial cue  
159 epoch and decaying shortly after the first delay (**Fig2a, c**). This is surprising given that DLPFC has  
160 often been implicated in the stable maintenance of working memory, but such discrepancies may be  
161 due to variability in recordings along the anterior-posterior gradient of DLPFC<sup>41</sup>, or studies describing

162 DLPFC cells or lesions which extend to surrounding areas including VLPFC<sup>1,4,5</sup>. OFC had phasic  
163 representations of spatial location during cue presentation and response<sup>42</sup> (**Fig2a, c**), while ACC only  
164 exhibited brief spatial selectivity at the time of reward. ACC, OFC and VLPFC all had prolonged  
165 maintenance of reward size in both trial types (**Fig2b, d**), consistent with ACC and OFC playing a key  
166 role in reward-guided behaviour<sup>33,43-45</sup>.

### 167 **Population-activity separated by resting time constant**

168 We next sought to link the two previous analyses, exploring whether the heterogeneity of single-  
169 neuron time constants (**Fig1c**) predicted different functional roles during working memory. As cells  
170 with higher taus have an intrinsic capacity for sustained persistent activity, we hypothesised that  
171 these cells would more likely be integral to stable attractor states and therefore exhibit stronger and  
172 more prolonged maintenance of spatial information<sup>7,13</sup>. We focussed upon VLPFC, as this was the  
173 only candidate region with sustained spatial selectivity. We subdivided the population based upon a  
174 median split of tau<sup>33</sup>, and then re-computed the spatial and reward discriminability as in **Fig2** for  
175 high and low tau subpopulations (**Fig3**).

176 As hypothesised, the high tau VLPFC neuronal subpopulation had more sustained selectivity for both  
177 spatial and reward information. Both tau subpopulations showed a similar temporal profile to the  
178 whole population of VLPFC neurons, but selectivity in the low tau population decayed quickly  
179 following stimulus offset. A formal comparison between the two subpopulations indicated the high  
180 tau subpopulation had stronger spatial selectivity during delay one ( $p=0.0482$ , cluster based  
181 permutation test) and reward cue presentation ( $p = 0.0027$ ) of the SR task (**Fig3a**), and stronger  
182 reward coding during delay one ( $p = 0.0457$ ) and when the spatial cue was presented ( $p=0.0077$ ) on  
183 the RS task (**Fig3d**). However, an examination of activity during the task epoch when the respective  
184 reward or spatial cue was onscreen revealed strong selectivity that was statistically indistinguishable  
185 between the two subpopulations (“spatial cue” of **Fig3a,c**; “reward cue” of **Fig3b,d**). In other words,  
186 it is not the case that low tau subpopulations are simply less task-selective. Instead, high tau cells  
187 appear to be specialised for exhibiting sustained selectivity across delays, a property which may be  
188 critical for supporting WM processes.

### 189 **Cross-temporal activity separated by resting time constant**

190 The results presented so far – sustained population-level selectivity across delays only in cells with  
191 persistent resting activity - could be explained by both attractor models and alternate hypotheses of  
192 working memory<sup>7,46</sup>. They are also consistent with previous reports relating baseline autocorrelation  
193 to WM activity in single neurons<sup>47</sup>. The population WM selectivity in **Fig3** could be supported either  
194 by individual neurons maintaining strong selectivity across the trial, or neurons dynamically  
195 encoding information with different latencies and durations such that the population-level  
196 selectivity is maintained over time.

197 To contrast between these hypotheses, we performed a cross-temporal pattern analysis to probe  
198 the stability of the active encoding state<sup>33,38</sup>. To study cross-temporal generalisation of task  
199 selectivity, a classifier is trained at one timepoint ( $t$ ) and tested at a different timepoint ( $t + \delta$ ). If  
200 there remains a strong correlation between the test and training set at two distinct timepoints,  
201 selectivity generalises across the period between the two timepoints. By using all  $n$  timepoints as  
202 training and test sets, an  $n \times n$  correlation matrix can be constructed.

203 The resulting pattern of generalisation can distinguish between different working memory models,  
204 as indicated by the exemplars in **Fig4a**. The first example shows a ‘stable attractor’ model on SR  
205 trials<sup>7</sup>. Soon after the spatial cue is visible, a stable state of network activity forms specific to each  
206 spatial location. This pattern of activity generalises (i.e., the “off-diagonal” regions of the matrix)  
207 throughout the time the stimulus remains in working memory (illustrated by red colour from  
208 stimulus presentation onwards). A revised ‘stable subspace’ version of this model incorporates a  
209 dynamic component during the cue period, with a stable state only present from the delay period  
210 (Exemplar 2)<sup>13</sup>. In this version, spatial coding during cue presentation doesn’t generalise to later  
211 periods in the trial, but a stable attractor is formed around the time of stimulus offset. A third  
212 exemplar shows what may happen if this stable subspace were to be disrupted by the presentation  
213 of the reward cue (‘distractable subspace’). A final example shows a purely ‘dynamic coding’ model  
214<sup>38,46</sup>, whereby dynamic on-diagonal selectivity maintains an active representation of spatial  
215 information across time, but this never reaches a fixed point of stable network activity (i.e., lack of  
216 off-diagonal shading).

217 The pattern produced by the activity of the VLPFC high tau subpopulation exhibited elements  
218 consistent with both stable and dynamic coding (**Fig 4b, d**)<sup>13,48</sup>. Coding from the spatial cue period  
219 was not positively correlated with the subsequent delay, consistent with dynamic activity during the  
220 initial encoding phase. Surprisingly, neural activity was anti-correlated between the cue and the  
221 delay (largest cluster,  $p < 0.0001$ ; cluster based permutation test), suggesting the way the network  
222 encodes spatial information reverses between cue presentation and delay. This selectivity pattern  
223 reversal was also evident in VLPFC reward coding, but was not present in any other PFC area despite  
224 strong reward selectivity in ACC and OFC (**Supplementary Fig1**).

225 Despite this dramatic reversal of selectivity from the cue to delay periods, a stable state of cross-  
226 temporal generalisation was established in the high tau subpopulation during the first delay epoch  
227 which was sustained through the reward cue epoch (**Fig4b**; largest cluster,  $p < 0.0001$ ; cluster based  
228 permutation test). This finding is consistent with the VLPFC high tau subpopulation demonstrating  
229 attractor-like working memory activity in classical tasks without intervening stimuli<sup>1,7,13</sup>. However,  
230 the cross-generalisation of maintained spatial information was disrupted during the subsequent  
231 reward delay epoch on SR trials, and there was no significant generalisation between the activity in  
232 the first and second delay (**Fig4b**, no candidate clusters). The fact that network activity in the VLPFC  
233 high tau subpopulation is dynamic at cue presentation, then exhibits a reversed stable state of  
234 generalisation which is disrupted following the distractor (reward cue), suggests VLPFC network  
235 activity is not performing the function of a conventional attractor for spatial working memory<sup>7</sup>.

236 Compared with high tau cells, the VLPFC low tau subpopulation had much more transient dynamics  
237 (**Fig4c, e**). Although there is weak on-diagonal selectivity, this does not extend off the diagonal,  
238 consistent with dynamic coding. The spatial selectivity in the high tau subpopulation was  
239 significantly more stable over time during the post-stimulus delay and shortly after (largest clusters,  
240 SR  $p = 0.0002$ , RS  $p = 0.0135$ ; cluster based permutation test; **Supplementary Fig2**). In summary, of  
241 all of the subpopulations across the PFC areas we examined, only the high tau VLPFC subpopulation  
242 formed a stable spatial mnemonic representation, but the additional task element of a salient  
243 distractor allowed us to show that this state was inconsistent with current attractor models.

244

## 245 **Anti-correlation between Cue and Delay Period Activity**

246 Recent work has suggested that stable population activity can co-exist alongside strong temporal  
247 dynamics during the initial encoding phase<sup>13</sup>. This can occur if the mnemonic representation is  
248 established at the time of the cue but is accompanied by a transient, orthogonal pattern of activity.  
249 These results would appear inconsistent with the reversal of spatial coding we observed in the VLPFC  
250 high tau population between cue presentation and delay. To examine this issue in more detail, we  
251 correlated activity within the VLPFC high tau subpopulation across time within each condition (**Fig5a**,  
252 see **Methods**)<sup>13</sup>. This showed a strong positive correlation across the whole trial, including between  
253 cue and delay periods (asterisk on **Fig5a**). This suggests that within a given spatial location, VLPFC  
254 high tau firing rates were stable and correlated across the trial (as opposed to the instability and  
255 reversal of mnemonic coding across the trial evident in **Fig4**). Whilst this may be taken as evidence  
256 against a reversal of selectivity patterns, we reasoned this positive correlation may be largely driven  
257 by the intrinsic firing rates of the neurons (e.g. a neuron which is high firing during the cue may also  
258 be higher firing during the delay even if it is modulated across the trial). By demeaning activity across  
259 conditions for each neuron and repeating the analysis, we revealed an anticorrelation in the activity  
260 of high tau VLPFC neurons between the spatial cue and delay periods (asterisk on **Fig5b**, see  
261 **Methods**). The high cross-trial correlations observed in **Fig5a** are therefore likely driven by neurons  
262 possessing relatively consistent firing across the trial.

263 To further examine the stability and pattern of spatial selectivity across the trial using an alternate  
264 method, we employed principal component analysis (PCA). Previously, this method revealed a  
265 mnemonic subspace that was stable from cue onset through the delay period<sup>13</sup>. The mnemonic  
266 subspace was defined by time-averaging delay period activity for each stimulus condition for each  
267 neuron and running PCA across conditions (conditions x neurons matrix). Projecting data from the  
268 cue period into this subspace still enabled decoding of spatial position, supporting the proposal that  
269 the stable activity in the delay period is already established during cue presentation<sup>13</sup>.

270 We tried to replicate this PCA approach in the high tau VLPFC subpopulation (**Fig5c-d**, see **Methods**),  
271 by defining the subspace based upon time-averaged delay one activity in the SR trials. We then  
272 projected neural firing from across the trial onto the first two principal axes (**Fig5c**). If the mnemonic  
273 representation is stable, all traces should be fairly fixed and separable across time (as in ref<sup>13</sup> FigS3).  
274 During the first delay, there is a stable representation of mnemonic information, as all conditions are  
275 separable within this subspace. The representation of space is also shown to be geometrically  
276 consistent with the spatial environment, with the activity for nearby spatial locations clustered in the  
277 subspace. However, supporting our previous analyses, projecting neural activity from the cue period  
278 into the subspace didn't lead to a reliable spatial code. Remarkably the spatial conditions were  
279 separable in the cue period, but in the opposite direction to that observed during the delay period.  
280 This pattern was also replicated for reward coding on RS trials, suggesting this reversal is a general  
281 pattern of VLPFC coding between cue and delay periods, and not limited to spatial selectivity  
282 (**Supplementary Fig3**). To quantify the reliability of the SR Delay 1 subspace, we calculated the  
283 variance explained by projecting data at each timepoint (**Fig5d**). Unlike previous findings<sup>13</sup>, the  
284 mnemonic subspace in the delay explains only a small proportion of variance during the cue period.

285 In short, we find little evidence that the VLPFC high tau subpopulation forms a stable subspace  
286 maintaining information from cue onset through the delay. Rather, the population geometry



287 reverses its selectivity pattern for both reward and spatial information between the cue and delay  
288 periods (**Fig4b, 4d, Fig5c-d, Supplementary Fig3**), before forming a stable subspace that maintains  
289 WM-related information across the initial delay before the subsequent cue (distractor) period.

### 290 **Cross-Task Generalisation**

291 Thus far we have demonstrated that only high tau VLPFC neurons exhibit stable *cross-temporal*  
292 *generalisation* of mnemonic information. We next explored whether there was *cross-task*  
293 *generalisation* between SR and RS trials. Previous studies have demonstrated task-specific PFC  
294 activity to identical stimuli when they cue a different response<sup>49,50</sup>. However, whether the pattern  
295 and stability of population activity depends on the order in which identical information (cueing the  
296 same response) is received remains unknown. To explore this, we used data from one trial type as a  
297 training set, and data from the other trial type as a test set. This analysis allowed us to test, for  
298 example, whether the population pattern for spatial selectivity that emerges in delay one of SR trials  
299 (**Fig4b**) is similar to the population pattern for spatial selectivity in delay two of RS trials. This  
300 analysis also allowed us to test whether the population pattern in delay two was similar across both  
301 trial types; at this point in the trial, the subjects have processed the same information and are  
302 required to prepare the same response.

303 **Fig6a** depicts three possible exemplars for cross-task generalisation. As demonstrated in **Fig2**, VLPFC  
304 has spatial coding on both trial types, thus if there is “no across-task generalisation” this would  
305 mean there are multiple network patterns of spatial selectivity capable of supporting correct  
306 performance. In “stimulus/delay-locked cross-task generalisation”, the population pattern in the  
307 spatial cue and subsequent delay periods is similar across trial types. In this scenario, spatial location  
308 could be readout identically across trial types using activity post-stimulus presentation (red colour  
309 on heatmap), but because spatial selectivity on SR trials is disrupted by the reward cue (**Fig4**),  
310 distinct readout weights would be required at the time of response. In “action-dependent cross-task  
311 generalisation”, the population selectivity pattern is similar across trial types only during delay two  
312 and the saccade response. This may occur if a different route through neural state space is taken on  
313 the two trial types, but the routes converge and the same common endpoint is reached by delay  
314 two.

315 We performed this analysis on all recorded VLPFC neurons. The activity pattern of this population  
316 was primarily consistent with stimulus locked generalisation (**Fig6b**). This is because there is strong  
317 cross-task generalisation between when the spatial cue is presented and during the initial one-  
318 second mnemonic period following that (Cue period  $p < 0.0001$ ; Delay period  $p < 0.0001$ ; cluster based  
319 permutation tests). There is then little cross-task generalisation in delay two, indicating distinct  
320 activity patterns in this epoch between the two tasks. We confirmed a strong representation of trial  
321 type during delay two using a separate decoding algorithm, which discriminated activity related to  
322 trial type (**Fig6c**, see **Methods**). These results indicate that a different set of read-out weights for  
323 working memory of spatial location would be required from VLPFC activity for correct performance  
324 on the two trial types, implying multiple, independent task-specific neural states can support  
325 working memory.

326

327

## 328 Single neurons switch between reward and spatial selectivity

329 Thus far, the results suggest a heterogeneous and primarily dynamic account of working memory  
330 activity within the PFC population. To examine the underlying pattern of this population  
331 heterogeneity, we analysed single neuron selectivity for different task features. This analysis  
332 explored how strong and sustained WM selectivity patterns were in individual neurons<sup>8,48</sup>, how  
333 these WM representations were affected by the presentation of a second salient cue (which may  
334 induce selectivity competition), and whether neural activity in delay two encoded a combination of  
335 task variables<sup>25,26</sup>.

336 To quantify single-neuron encoding of both reward and spatial information, we ran a separate one-  
337 way Kruskal-wallis test for space and reward at each timepoint (**Fig7a, b**). Encoding at each  
338 timepoint was determined significant through a cluster-based permutation test (see **Methods**;  
339 cluster-forming threshold,  $p < 0.05$ ). This allowed us to plot whether each neuron was encoding  
340 space, reward or both factors at any given point in time (**Fig7c, d**). On the SR trials, a large  
341 proportion of VLPFC neurons were selective for spatial location during cue presentation or the  
342 subsequent delay (**Fig7a, top**). These neurons had heterogeneous onset latencies and most were  
343 transiently selective, as opposed to sustaining a spatial representation across time. Strikingly, many  
344 of these spatially selective neurons subsequently coded reward size later in the trial (**Fig7a, bottom**).  
345 This is consistent with the VLPFC population analysis (**Fig2**) showing that the most recently  
346 presented stimulus is encoded, as opposed to the task-relevant spatial information necessary for  
347 correct performance. A similar result was also observed on RS trials, where many reward-selective  
348 neurons (**Fig7b, top**) subsequently encoded spatial location (**Fig7b, bottom**). This suggests that the  
349 population-level patterns we observed (**Fig2**) arise because single PFC neurons are involved in  
350 multiple distinct cognitive functions<sup>25</sup>, as opposed to different subpopulations representing different  
351 task-related factors becoming active at different stages of the trial.

352 The ability of PFC neurons to encode both reward and spatial information may highlight neuronal  
353 flexibility, or the facility to code multiple factors concurrently. **Figs7c-d** characterise the proportion  
354 of neurons simultaneously coding spatial and reward information. During the presentation of the  
355 second cue, some neurons appeared to multiplex reward and spatial information. To establish the  
356 nature of this mixed selectivity, we ran a 2-way ANOVA to explore any interaction effects (**Fig8**, see  
357 **Methods**). It could be that neurons code both factors with a non-linear interaction<sup>21,25</sup>, exhibiting a  
358 different pattern or degree of spatial coding at each reward level. Alternatively, both factors could  
359 be coded simultaneously without an interaction<sup>51</sup> (e.g. similar pattern of spatial selectivity for each  
360 reward level resting upon a different baseline firing rate). We found little evidence for non-linear  
361 mixed selectivity. Instead, there was a positive correlation between selectivity for space and reward  
362 at the time of the second cue (**Fig8**), implying most neurons that exhibit mixed selectivity for  
363 multiple factors do so as a linear combination.

364 This flexibility of single-neuron selectivity patterns appears inconsistent with more traditional  
365 accounts of PFC function during working memory. To quantify the proportion of neurons exhibiting  
366 stimulus-specific selectivity throughout the trial, we split the data into eight 500ms epochs from  
367 fixation onset until the response was cued. We ran a separate Kruskal-wallis test on the average  
368 firing rate of each neuron across these epochs. A subpopulation of neurons with selective responses  
369 during the initial cue presentation was defined ( $n=73$  for reward,  $n=72$  for space). The proportion of

370 this subpopulation selective for each factor was then calculated for all other epochs (**Fig7e**). On SR  
371 trials, this showed that only 18.06% of the spatially selective neurons at cue one are selective for  
372 spatial location alone by the end of the second delay. Around the same proportion (15.28%) had  
373 additionally gained a representation of reward size, whilst a further 19.44% had no significant spatial  
374 selectivity and switched to coding reward. The majority (47.22%) of spatially selective neurons at cue  
375 one were non-selective by the end of delay two. Thus unlike classical notions of working memory  
376 being supported by sustained selectivity<sup>1,2</sup>, our results suggest single neurons do not maintain  
377 sustained working memory correlates<sup>9</sup>, at least not in cases where other task-relevant or salient  
378 information may compete for neuronal representation.

379

## 380 Discussion

381 Here we used a spatial working memory task with a distracting reward cue to test whether working  
382 memory (WM) is subserved by persistent activity in single neurons or by dynamic activity across a  
383 neural population. This task design with a distractor allowed us to specifically contrast these  
384 different hypotheses of WM coding. A recent cortical attractor model of WM would suggest a  
385 dynamic cue-related response followed by a stable state of fixed network activity specific to the  
386 mnemonic stimulus<sup>13</sup>. This model would predict that if changes in this stable state were induced by  
387 distractor presentation, this would compromise the WM representation. This constraint does not  
388 apply to WM models that do not rely on stable network states. Of the four PFC subregions  
389 examined, mnemonic selectivity during the delays was present only in VLPFC neurons, and this was  
390 present only in the subpopulation of neurons with high time constants. Within these VLPFC neurons,  
391 the pattern of both reward and spatial selectivity reversed from the cue to delay epochs, where it  
392 then became stable and generalised across time. However, once the reward cue was presented,  
393 spatial selectivity was largely quenched and instead the VLPFC population switched to coding the  
394 salient reward information. These results demonstrate that high tau VLPFC neurons are capable of  
395 stable selectivity that could serve WM functions, but that in contexts where multiple behaviourally  
396 relevant stimuli are available, VLPFC neurons flexibly code the focus of current attention<sup>26,37,39</sup>.

397 Both attractor<sup>13,19,52</sup> and synaptic models<sup>14</sup> of working memory stress the importance of a recurrent  
398 network architecture. By using the decay of autocorrelation of spiking activity during a fixation  
399 period as an unbiased metric of intrinsic persistent activity, we demonstrate that neurons with  
400 higher time constants (taus) are more likely to exhibit working memory-related selectivity, but only  
401 in the VLPFC population. The VLPFC high tau subpopulation had stable selectivity during the initial  
402 delay period following stimulus offset, whereas the low tau subpopulation exhibited dynamic coding.  
403 Importantly, any distinction between the high and low tau VLPFC subpopulations was only evident  
404 during this mnemonic phase, ruling out the possibility that high tau cells are simply more task-  
405 selective. These results build upon recent work showing PFC neurons with higher taus have a greater  
406 role in decision-making and the maintenance of reward information over extended time periods<sup>33</sup>,  
407 highlighting a broader role for high time constant neurons subserving extended cognitive processes.  
408 These findings would therefore appear supportive of theories proposing that cortical attractor  
409 networks fulfil WM functions<sup>7,13</sup>.

410 However, we also observed several features of the data which suggest VLPFC activity is incompatible  
411 with current attractor models. Firstly, we showed that VLPFC reverses both its spatial and reward  
412 tuning between cue presentation and the subsequent delay. Previous studies have shown that cue  
413 and delay dynamics are distinct<sup>13,38,48</sup>, but our discovery that the tuning geometry reverses between  
414 cue and delay appears novel. This finding is also inconsistent with a stable subspace spanning both  
415 cue presentation and memory<sup>13</sup>. The inverted tuning geometries may reflect a mechanism to  
416 dissociate stimuli currently in the environment and those held within memory<sup>53</sup>, or alternatively a  
417 mechanism to load information into working memory from an initial state of dynamic sensory  
418 encoding.

419 By probing the effect of a salient reward cue on the stability of mnemonic representations, we were  
420 able to further test whether cortical attractors in PFC provide a mechanism for distractor-resistant  
421 WM. It was shown that the intervening reward cue quenched the WM selectivity pattern in the  
422 VLPFC population. A recent report similarly showed that a task-irrelevant distractor morphed spatial  
423 selectivity of PFC neurons<sup>21</sup>; however this irrelevant distracting cue could be instantly dismissed and  
424 was not encoded. The PFC population activity, although morphed with respect to activity pre-  
425 distraction, could therefore continue to maintain a strong mnemonic representation. In our  
426 paradigm, the reward cue acted as a more ethologically-valid distractor with behavioural relevance.  
427 Reward anticipation is known to activate a large proportion of neurons in prefrontal cortex<sup>22,43,54-59</sup>,  
428 and many neurons holding the spatial representation flexibly switched to code the reward. This  
429 suggests that different neural mechanisms may be required to maintain WM when a distracting  
430 stimulus also carries behavioural relevance and activates neurons across PFC. This WM mechanism  
431 seemingly eludes current attractor models, which predict distractor-resistant spatial selectivity.

432 The dynamic switch of VLPFC activity to coding the behaviourally relevant distractor provides further  
433 evidence that PFC neurons can be tuned to multiple diverse cognitive factors and that they can flip  
434 between them within the course of a trial<sup>25,27,48,60</sup>. It also suggests previous studies concluding PFC  
435 neurons are resistant to distraction do not generalise to more behaviourally salient stimuli<sup>28-30</sup>. Here  
436 we use a reward-predictive cue presented at the fixation spot, as opposed to a peripherally flashed  
437 target<sup>29</sup> or stimulus<sup>21,28</sup> which is irrelevant to the task. The flexibility with which VLPFC neurons  
438 changed the factor they encoded also has implications for accounts of mixed selectivity<sup>21,25,51</sup>. Shortly  
439 after the second stimulus was shown, there was evidence for neurons encoding a combination of  
440 factors. However, we found the majority of this mixed selectivity was linear<sup>51</sup>, as opposed to non-  
441 linear<sup>21,25</sup>.

442 Inverted tuning between cue and delay, a weakening of a stable mnemonic representation by a  
443 distracting cue, and neurons flexibly encoding both factors all suggest VLPFC activity is incompatible  
444 with existing cortical attractor models<sup>13</sup>. There are several possible interpretations of the WM  
445 activity we observed across PFC. Although WM-related activity and WM-deficits following brain  
446 damage are both most commonly associated with LPFC<sup>4,5,61</sup>, it is conceivable that classical distractor  
447 resistant stable activity was present in a PFC region we did not sample. However, we sampled a large  
448 expanse of LPFC including both banks of the principal sulcus (PS: areas 9/46d, 946v), and several  
449 millimetres of cortex both dorsal (area 9) and ventral (areas 45a, and 47/12) to PS, as well as parts of  
450 the medial (ACC) and ventral (OFC) PFC. Mnemonic activity has been observed in other brain  
451 regions, such as the parietal cortex<sup>62,63</sup>. However, this activity is more sensitive to distraction<sup>29,64</sup>, and  
452 parietal inactivation produces comparatively modest WM deficits relative to PFC, suggesting it plays

453 less of a role in WM processes<sup>6,65,66</sup>. A further possibility is that we may have missed stable,  
454 persistent activity in PFC because of a more anterior recording location than previous studies<sup>41</sup>. We  
455 also consider this interpretation unlikely. Recent studies recording more posteriorly in LPFC including  
456 the frontal eye field have shown that selectivity for a remembered spatial location is not stable when  
457 either multiple mnemonic stimuli are subsequently presented or a distractor appears<sup>21,67</sup>. Instead,  
458 we note that the vast majority of tasks reporting stable coding do so during a delay period where  
459 there is only one mnemonic representation to be maintained and no intervening stimuli<sup>2,3,13,48</sup>. Had  
460 our study similarly terminated at the end of delay one on SR trials (**Fig4b**), our findings would be  
461 highly consistent with findings of these tasks<sup>13</sup>. Crucially, without presentation of a distractor  
462 stimulus, both the most recently presented stimulus and the posited locus of the subject's attention  
463 are confounded with working memory<sup>39</sup>. Our findings suggest stable mnemonic representations are  
464 present in PFC, specifically in high tau VLPFC neurons, but that these neurons can also flexibly switch  
465 which information they encode as other behaviourally relevant variables compete for the subject's  
466 attention.

467 Of the PFC regions studied, VLPFC mnemonic representations were the strongest, and the only ones  
468 present during the second delay of SR trials, although in an altered state relative to the initial delay.  
469 The question therefore remains how WM is achieved on this task. One possibility, although not  
470 directly verifiable with our data, is that a PFC region maintains a representation of the mnemonic  
471 stimulus in an activity silent state<sup>14,15</sup>. Alternatively, PFC may be essential for setting up a stable  
472 mnemonic spatial representation during the initial delay which can then be transmitted to  
473 oculomotor regions to prepare a saccade, akin to activity for reaching movements<sup>68</sup>. Either way, our  
474 data are incompatible with PFC maintaining WM in cortical attractor networks throughout a delay  
475 interrupted with a behaviourally relevant distractor. This provides novel neurophysiological evidence  
476 that stable activity states within PFC may be more tightly associated with the most-recently  
477 presented behaviourally-relevant stimulus, rather than the contents of working memory.

478

479

## 480 Methods

### 481 Subjects and neurophysiological procedures

482 Neurophysiological procedures and task design have been reported previously<sup>36,37</sup>. In brief, two male  
483 rhesus macaques (*Macaca mulatta*) served as subjects. Single neuron recordings were taken from  
484 four regions of prefrontal cortex (**Fig1b**) including dorsolateral prefrontal cortex (DLPFC, n=209),  
485 ventrolateral prefrontal cortex (VLPFC, n=206), orbitofrontal cortex (OFC, n=152) and the anterior  
486 cingulate cortex (ACC, n=198). Histological reconstructions of the precise locations of all recorded  
487 neurons have been reported previously<sup>36,37</sup>. We randomly sampled neurons and did not attempt to  
488 pre-select neurons based on responsiveness to enable a fair comparison of neuronal properties  
489 between different brain regions.

490

491

492 **Task**

493 A detailed overview of the task structure has been described elsewhere<sup>36,37</sup>. We monitored eye  
494 position and pupil dilation during the task using an infrared system (ISCAN). Subjects first fixated a  
495 central cue for 1000ms before two cues were presented sequentially, each for 500ms, each followed  
496 by a 1000ms delay. One of the cues was a spatial location that the subject had to hold in working  
497 memory, and the other indicated how much reward the subject would receive for correct  
498 performance of the trial. We used 24 different spatial positions and two different reward-predictive  
499 picture sets, each cue indicating one of five reward levels (**Fig1a**). The 24 spatial targets were  
500 regularly distributed in a 5 x 5 matrix centred at the fixation spot, with each position separated by  
501 4.5° of visual angle. The positions were collapsed into eight locations forming triangles to allow for  
502 sufficient trials for the decoding analyses. On Space-Reward (SR) trials, the spatial position was  
503 shown first followed by the reward cue, whereas on Reward-Space (RS) trials the cues were  
504 presented in the reverse order. If subjects maintained fixation through both of the cue and delay  
505 periods, the fixation cue changed colour and the subject could initiate a saccade to the remembered  
506 spatial location (**Fig1a**). If the saccade terminated within 3° of the remembered target and was  
507 maintained in this location for 150ms, a reward was delivered and the trial was recorded correct.  
508 Trials where fixation was maintained but the saccade failed to terminate in the remembered  
509 location were recorded as errors. Different trial types and conditions were randomly intermingled.  
510 Subjects completed ~600 correct trials per day.

511 **Data-analysis**

512 Single-neuron activity during a 1000ms fixation period was used to assign time constants (**Fig1c-d**)<sup>33</sup>.  
513 Single unit responses were time-locked to the onset of the fixation period of successfully completed  
514 trials. Fixation-period rasters were divided into 20 discrete, successive 50ms bins. The spike count  
515 for each neuron within each bin was calculated for each trial. Pearson's correlation coefficient was  
516 used to compute the across-trial correlation of spike-counts between all of the bins. For each single  
517 neuron, this produced an exponential decay when autocorrelation was plotted as a function of time  
518 lag between bins (as in **Fig1d**). The decay of the autocorrelation was fitted to the data using the  
519 following equation<sup>34</sup>:

520 
$$R(k\Delta) = A \left[ \exp\left(-\frac{k\Delta}{\tau}\right) + B \right] \text{ (Eq.1)}$$

521 In which  $k\Delta$  refers to the time lag between time bins (50 to 950ms) and  $\tau$  is the time constant of the  
522 neuron (**Fig1c**), when data from one autocorrelogram is fitted, or the cortical area when data from  
523 all neurons within that area are fitted together (**Fig1d**). Neurons from all areas, particularly ACC,  
524 showed evidence of lower correlation values at the shortest time lag<sup>33</sup>. This may reflect  
525 refractoriness or negative adaptation<sup>34</sup>. To overcome this, fitting started from the largest reduction  
526 in autocorrelation (between two consecutive time bins) onwards.

527 All recorded neurons were included in the population-level time constant analysis (**Fig1d**). Single  
528 neurons were assigned a time constant if their autocorrelogram could be reasonably described by an  
529 exponential decay<sup>33</sup>. Neurons were therefore automatically excluded if they had a fixation firing rate  
530 of <1Hz or no decline in their autocorrelation function in the first 250ms of time lags (28 of 765  
531 excluded). Neurons were also excluded if the fitting produced extreme parameters ( $A > 1.2$ ,  $A < 0$ ,  
532  $\tau > 1000$ ,  $\tau < 10$ ; 156 of 737 excluded). Finally, this was followed by a process of visual inspection where

533 a further set of neurons were excluded which were considered to possess autocorrelation functions  
534 poorly characterised by an exponential decay (172 of 581 excluded). This left 141 DLPFC, 157 VLPFC,  
535 73 OFC and 38 ACC neurons for analysis. Two independent observers completed this process, blind  
536 to each neuron's functional properties and recording location. The majority of excluded cells were  
537 recorded in ACC, where many neurons' autocorrelation functions were flat, possibly reflecting a  
538 timescale longer than could be indexed with a 1-second foreperiod. In VLPFC, which is the brain  
539 region where most analyses were performed, only 23.8% of all recorded neurons were excluded. All  
540 results were replicated without the visual inspection exclusion criteria.

541 A multivariate decoding approach was used to investigate population-dynamics of working memory  
542 coding<sup>38</sup>. Decoding was performed separately for different task-types (i.e. SR or RS) and different  
543 task features (i.e. space and reward). For each neuron, correct trials were split equally into a training  
544 set and a test set. Within each set, trials were grouped according to the relevant feature to be  
545 decoded (either eight spatial groups or five reward levels). Neuronal firing rate for each of these  
546 conditions (*Conds*) was averaged across trials for each neuron producing a vector length *Conds*. The  
547 pairwise difference between neural firing in each of the conditions was calculated. For eight spatial  
548 locations (five reward levels) this produced 28 (10) pairwise differences (*PWDs*). The Pearson's  
549 correlation coefficient for each *PWD* was calculated across neurons between the training set and the  
550 test set. These correlation coefficients were averaged using Fisher's Z-transformation to produce a  
551 single correlation-coefficient quantifying either reward discriminability or spatial discriminability.  
552 This process was repeated for each timepoint, so that the temporal profile of decodability could be  
553 evaluated (**Fig2-3**). A similar analysis was used to probe if the task being performed could be  
554 decoded (**Fig6c**).

555 Cluster-based permutation tests were used to correct for multiple comparisons while assessing the  
556 significance of time-series data<sup>33,69</sup>. Discriminability metrics were compared between the high and  
557 low tau subpopulations using Fishers-Z transformation (**Fig3**). This yielded a test-statistic at each  
558 timepoint. Test statistics were divided into ten, non-overlapping 500ms epochs beginning at fixation  
559 onset. Consecutive bins in each analysis window with an uncorrected (cluster-forming) threshold of  
560  $p < 0.05$  (one-tailed) were defined as candidate clusters. The size of the clusters were compared to a  
561 null distribution constructed using a permutation test. Neurons assigned to each subpopulation  
562 were randomly permuted 10,000 times and the cluster analysis was repeated for each permutation.  
563 The length of the longest cluster for each permutation was entered into the null distribution. The  
564 true cluster size was significant at the  $p < 0.05$  ( $p < 0.01$ ) level corrected if the true cluster length  
565 exceeded the 95<sup>th</sup> (99th) percentile of the null distribution. A cluster's significance was determined  
566 to be  $p < 0.0001$  if its length exceeded all those in the null distribution. A similar method was used to  
567 compare discriminability to chance levels (**Fig2**). Consecutive bins in each analysis window with an  
568 uncorrected (cluster-forming) threshold of  $p < 0.01$  (two-tailed) were defined as candidate clusters. In  
569 this case, permuted clusters were calculated by shuffling the order of neurons in each of the *PWDs*  
570 in the test set.

571 The multivariate decoding approach allowed us to also probe the cross-temporal stability of  
572 mnemonic representations (**Fig4**). The discriminability measure described above involved correlating  
573 the *PWDs* calculated at the same timepoint for a training and a test set. In the cross-temporal  
574 analysis, a *timepoints x timepoints* matrix was constructed where the training set at each timepoint  
575 was tested at all other timepoints<sup>33,38</sup>. In **Fig4** the matrix of correlation coefficients was averaged

576 across the diagonal in order for the data to reflect both training-to-test and test-to-training trial  
577 projections. To probe the stability of population coding in this analysis, cluster-based permutation  
578 tests were used. Neighbouring pixels in each analysis window with an uncorrected (cluster-forming)  
579 threshold of  $p < 0.01$  (two-tailed) were defined as candidate clusters. The null distribution was  
580 generated by the same permutation method as in **Fig2**. To compare the stability between high and  
581 low time constants, a two-dimensional version of the Fishers-Z transformation method described  
582 above was used (**Supplementary Fig2**).

583 Independent to selectivity measures, neural firing rate was correlated across the trial (**Fig5a, b**).  
584 Firing rate for each condition (eight spatial locations, five reward levels) was correlated across  
585 neurons between each timepoint pair. A separate training and test set were defined based upon a  
586 split half of the trials. The matrix of correlation coefficients plotted represents the average (using  
587 Fisher's Z-transform) value across all of the conditions (**Fig5a**). For **Fig5b**, prior to performing the  
588 correlation, neural firing rate was demeaned within each condition and timepoint for each neuron.

589 Principal component analysis (PCA) was used to perform a state space analysis (**Fig5, Supplementary**  
590 **Fig3**)<sup>13</sup>. Each subspace was defined using a training set of data averaged across half of the available  
591 trials for each neuron and tested using data from the remaining half. This makes stimulus-variance  
592 captured non-arbitrary (**Fig5d**) and explains why only a minimal amount of variance is explained in  
593 fixation before stimulus presentation. For each neuron, firing rate on training set trials was averaged  
594 for each condition for each timepoint. For the fixation and delay one subspaces, activity was  
595 averaged across the relevant timepoints (Fixation: -1000 to 0ms relative to cue onset; Delay One:  
596 500ms to 1500ms relative to cue onset). This produced a *Conds x Neurons* matrix. Activity was  
597 demeaned across conditions for each neuron. PCA was then performed over conditions to define a  
598 low-dimensional coding subspace for the two epochs within a high-dimensional neural state space.  
599 For the dynamic subspace, firing was not averaged across timepoints and the PCA was performed  
600 separately at each timepoint. Therefore, a slightly different subspace is produced for each time  
601 point. Once the principal components have been defined, we projected the left-out test set data  
602 onto the principal axes of the subspaces (**Fig5c**). The plotted traces therefore display a low-  
603 dimensional representation of the trajectory of population activity in the subspace across time.

604 To assess the generalizability of the delay one subspace, we plotted the stimulus variance (**SV**) it  
605 captured across the trial relative to the fixation and dynamic subspaces (**Fig5d**). SV was calculated  
606 using the following formula:

$$607 \quad SV = \text{Tr}(Sub_k^T \times C \times Sub_k) \quad (\text{Eq.2})$$

608 In which **Sub<sub>k</sub>** refers to the subspace defined from training data (limited to the first k principal axes)  
609 and **C** refers to the across-stimuli covariance matrix of the test data. In our analyses, we used one  
610 fewer principal axes than the number of conditions (Space:  $k = 7$ ; Reward:  $k = 4$ ).

611 For the preliminary single-neuron encoding analyses (**Fig7a-d**), a one-way kruskal-wallis test was  
612 performed for spatial location and reward size at each time point. A cluster-based permutation test  
613 was performed to test for significance (**Fig7c-d**). Consecutive bins in each analysis window with an  
614 uncorrected (cluster-forming) threshold of  $p < 0.05$  were defined as candidate clusters. In this case,  
615 permuted clusters were calculated by shuffling the relevant feature (spatial location or reward size)



616 across trials. To probe whether neurons coding for both factors simultaneously demonstrated either  
617 linear or non-linear mixed selectivity, we performed a two-way ANOVA (**Fig8**).

618 Several graphs with time series data were smoothed across time bins for illustrative purposes (**Fig2**;  
619 **Fig3**; **Fig6c**; **Fig7c-d**, bottom half). A moving average spanning five 10ms bins was used. However, all  
620 statistical tests were performed on the unsmoothed data.

## 621 Acknowledgements

622 SEC was supported by the Middlesex Hospital Medical School General Charitable Trust. JDW was  
623 supported by funding from NIMH R01-MH097990 and NIDA R21-DA035209. LTH was supported by a  
624 Sir Henry Wellcome Fellowship from the Wellcome Trust (098830/Z/12/Z). SWK was supported by  
625 NIMH (F32MH081521) and by a Wellcome Trust New Investigator Award (096689/Z/11/Z). We thank  
626 S Mark for comments on an earlier draft of this manuscript.

## 627 References

628

- 629 1 Funahashi, S., Bruce, C. J. & Goldman-Rakic, P. S. Mnemonic coding of visual space in the  
630 monkey's dorsolateral prefrontal cortex. *J Neurophysiol* **61**, 331-349 (1989).
- 631 2 Goldman-Rakic, P. S. Cellular basis of working memory. *Neuron* **14**, 477-485 (1995).
- 632 3 Fuster, J. M. & Alexander, G. E. Neuron activity related to short-term memory. *Science* **173**,  
633 652-654 (1971).
- 634 4 Bauer, R. H. & Fuster, J. M. Delayed-matching and delayed-response deficit from cooling  
635 dorsolateral prefrontal cortex in monkeys. *J Comp Physiol Psychol* **90**, 293-302 (1976).
- 636 5 Funahashi, S., Bruce, C. J. & Goldman-Rakic, P. S. Dorsolateral prefrontal lesions and  
637 oculomotor delayed-response performance: evidence for mnemonic "scotomas". *J Neurosci*  
638 **13**, 1479-1497 (1993).
- 639 6 Petrides, M. Lateral prefrontal cortex: architectonic and functional organization. *Philos Trans*  
640 *R Soc Lond B Biol Sci* **360**, 781-795, doi:10.1098/rstb.2005.1631 (2005).
- 641 7 Compte, A., Brunel, N., Goldman-Rakic, P. S. & Wang, X. J. Synaptic mechanisms and network  
642 dynamics underlying spatial working memory in a cortical network model. *Cereb Cortex* **10**,  
643 910-923 (2000).
- 644 8 Barak, O., Tsodyks, M. & Romo, R. Neuronal population coding of parametric working  
645 memory. *J Neurosci* **30**, 9424-9430, doi:10.1523/JNEUROSCI.1875-10.2010 (2010).
- 646 9 Shafi, M. *et al.* Variability in neuronal activity in primate cortex during working memory  
647 tasks. *Neuroscience* **146**, 1082-1108, doi:10.1016/j.neuroscience.2006.12.072 (2007).
- 648 10 Rainer, G. & Miller, E. K. Timecourse of object-related neural activity in the primate  
649 prefrontal cortex during a short-term memory task. *Eur J Neurosci* **15**, 1244-1254 (2002).
- 650 11 Jun, J. K. *et al.* Heterogeneous population coding of a short-term memory and decision task. *J*  
651 *Neurosci* **30**, 916-929 (2010).
- 652 12 Meyers, E. M., Freedman, D. J., Kreiman, G., Miller, E. K. & Poggio, T. Dynamic population  
653 coding of category information in inferior temporal and prefrontal cortex. *J Neurophysiol*  
654 **100**, 1407-1419, doi:10.1152/jn.90248.2008 (2008).
- 655 13 Murray, J. D. *et al.* Stable population coding for working memory coexists with  
656 heterogeneous neural dynamics in prefrontal cortex. *Proc Natl Acad Sci U S A* **114**, 394-399,  
657 doi:10.1073/pnas.1619449114 (2017).

- 658 14 Mongillo, G., Barak, O. & Tsodyks, M. Synaptic theory of working memory. *Science* **319**,  
659 1543-1546, doi:10.1126/science.1150769 (2008).
- 660 15 Stokes, M. G. 'Activity-silent' working memory in prefrontal cortex: a dynamic coding  
661 framework. *Trends Cogn Sci* **19**, 394-405, doi:10.1016/j.tics.2015.05.004 (2015).
- 662 16 Lundqvist, M. *et al.* Gamma and Beta Bursts Underlie Working Memory. *Neuron* **90**, 152-164,  
663 doi:10.1016/j.neuron.2016.02.028 (2016).
- 664 17 Goldman, M. S. Memory without feedback in a neural network. *Neuron* **61**, 621-634,  
665 doi:10.1016/j.neuron.2008.12.012 (2009).
- 666 18 Druckmann, S. & Chklovskii, D. B. Neuronal circuits underlying persistent representations  
667 despite time varying activity. *Curr Biol* **22**, 2095-2103, doi:10.1016/j.cub.2012.08.058 (2012).
- 668 19 Brunel, N. & Wang, X. J. Effects of neuromodulation in a cortical network model of object  
669 working memory dominated by recurrent inhibition. *J Comput Neurosci* **11**, 63-85 (2001).
- 670 20 Wang, X. J., Tegner, J., Constantinidis, C. & Goldman-Rakic, P. S. Division of labor among  
671 distinct subtypes of inhibitory neurons in a cortical microcircuit of working memory. *Proc*  
672 *Natl Acad Sci U S A* **101**, 1368-1373, doi:10.1073/pnas.0305337101 (2004).
- 673 21 Parthasarathy, A. *et al.* Mixed selectivity morphs population codes in prefrontal cortex.  
674 *Nature Neuroscience* **20**, 1770-1779, doi:10.1038/s41593-017-0003-2 (2017).
- 675 22 Kennerley, S. W., Dahmubed, A. F., Lara, A. H. & Wallis, J. D. Neurons in the frontal lobe  
676 encode the value of multiple decision variables. *J Cogn Neurosci* **21**, 1162-1178,  
677 doi:10.1162/jocn.2009.21100 (2009).
- 678 23 Miller, E. K. & Cohen, J. D. An integrative theory of prefrontal cortex function. *Annu Rev*  
679 *Neurosci* **24**, 167-202, doi:10.1146/annurev.neuro.24.1.167 (2001).
- 680 24 Mante, V., Sussillo, D., Shenoy, K. V. & Newsome, W. T. Context-dependent computation by  
681 recurrent dynamics in prefrontal cortex. *Nature* **503**, 78-84, doi:10.1038/nature12742  
682 (2013).
- 683 25 Rigotti, M. *et al.* The importance of mixed selectivity in complex cognitive tasks. *Nature* **497**,  
684 585-590, doi:10.1038/nature12160 (2013).
- 685 26 Rao, S. C., Rainer, G. & Miller, E. K. Integration of what and where in the primate prefrontal  
686 cortex. *Science* **276**, 821-824 (1997).
- 687 27 Blackman, R. K. *et al.* Monkey Prefrontal Neurons Reflect Logical Operations for Cognitive  
688 Control in a Variant of the AX Continuous Performance Task (AX-CPT). *J Neurosci* **36**, 4067-  
689 4079, doi:10.1523/JNEUROSCI.3578-15.2016 (2016).
- 690 28 Lennert, T. & Martinez-Trujillo, J. Strength of response suppression to distracter stimuli  
691 determines attentional-filtering performance in primate prefrontal neurons. *Neuron* **70**, 141-  
692 152, doi:10.1016/j.neuron.2011.02.041 (2011).
- 693 29 Suzuki, M. & Gottlieb, J. Distinct neural mechanisms of distractor suppression in the frontal  
694 and parietal lobe. *Nat Neurosci* **16**, 98-104, doi:10.1038/nn.3282 (2013).
- 695 30 Qi, X. L. *et al.* Comparison of neural activity related to working memory in primate  
696 dorsolateral prefrontal and posterior parietal cortex. *Front Syst Neurosci* **4**, 12,  
697 doi:10.3389/fnsys.2010.00012 (2010).
- 698 31 Jacob, S. N. & Nieder, A. Complementary roles for primate frontal and parietal cortex in  
699 guarding working memory from distractor stimuli. *Neuron* **83**, 226-237,  
700 doi:10.1016/j.neuron.2014.05.009 (2014).
- 701 32 Ogawa, T. & Komatsu, H. Differential temporal storage capacity in the baseline activity of  
702 neurons in macaque frontal eye field and area V4. *J Neurophysiol* **103**, 2433-2445,  
703 doi:10.1152/jn.01066.2009 (2010).
- 704 33 Cavanagh, S. E., Wallis, J. D., Kennerley, S. W. & Hunt, L. T. Autocorrelation structure at rest  
705 predicts value correlates of single neurons during reward-guided choice. *Elife* **5**,  
706 doi:10.7554/eLife.18937 (2016).
- 707 34 Murray, J. D. *et al.* A hierarchy of intrinsic timescales across primate cortex. *Nat Neurosci* **17**,  
708 1661-1663, doi:10.1038/nn.3862 (2014).

- 709 35 Zylberberg, J. & Strowbridge, B. W. Mechanisms of Persistent Activity in Cortical Circuits:  
710 Possible Neural Substrates for Working Memory. *Annu Rev Neurosci* **40**, 603-627,  
711 doi:10.1146/annurev-neuro-070815-014006 (2017).
- 712 36 Kennerley, S. W. & Wallis, J. D. Encoding of reward and space during a working memory task  
713 in the orbitofrontal cortex and anterior cingulate sulcus. *J Neurophysiol* **102**, 3352-3364,  
714 doi:10.1152/jn.00273.2009 (2009).
- 715 37 Kennerley, S. W. & Wallis, J. D. Reward-dependent modulation of working memory in lateral  
716 prefrontal cortex. *J Neurosci* **29**, 3259-3270, doi:10.1523/JNEUROSCI.5353-08.2009 (2009).
- 717 38 Stokes, M. G. *et al.* Dynamic coding for cognitive control in prefrontal cortex. *Neuron* **78**,  
718 364-375, doi:10.1016/j.neuron.2013.01.039 (2013).
- 719 39 Lebedev, M. A., Messinger, A., Kralik, J. D. & Wise, S. P. Representation of attended versus  
720 remembered locations in prefrontal cortex. *PLoS Biol* **2**, e365 (2004).
- 721 40 Watanabe, K. & Funahashi, S. Neural mechanisms of dual-task interference and cognitive  
722 capacity limitation in the prefrontal cortex. *Nat Neurosci* **17**, 601-611, doi:10.1038/nn.3667  
723 (2014).
- 724 41 Riley, M. R., Qi, X. L. & Constantinidis, C. Functional specialization of areas along the  
725 anterior-posterior axis of the primate prefrontal cortex. *Cereb Cortex*,  
726 doi:10.1093/cercor/bhw190 (2016).
- 727 42 Tsujimoto, S., Genovesio, A. & Wise, S. P. Monkey orbitofrontal cortex encodes response  
728 choices near feedback time. *J Neurosci* **29**, 2569-2574 (2009).
- 729 43 Kennerley, S. W. & Walton, M. E. Decision making and reward in frontal cortex:  
730 complementary evidence from neurophysiological and neuropsychological studies. *Behav*  
731 *Neurosci* **125**, 297-317, doi:10.1037/a0023575 (2011).
- 732 44 Rushworth, M. F., Kolling, N., Sallet, J. & Mars, R. B. Valuation and decision-making in frontal  
733 cortex: one or many serial or parallel systems? *Curr Opin Neurobiol* **22**, 946-955,  
734 doi:10.1016/j.conb.2012.04.011 (2012).
- 735 45 Hunt, L. T., Behrens, T. E., Hosokawa, T., Wallis, J. D. & Kennerley, S. W. Capturing the  
736 temporal evolution of choice across prefrontal cortex. *Elife* **4**, doi:10.7554/eLife.11945  
737 (2015).
- 738 46 Sreenivasan, K. K., Curtis, C. E. & D'Esposito, M. Revisiting the role of persistent neural  
739 activity during working memory. *Trends Cogn Sci* **18**, 82-89, doi:10.1016/j.tics.2013.12.001  
740 (2014).
- 741 47 Nishida, S. *et al.* Discharge-rate persistence of baseline activity during fixation reflects  
742 maintenance of memory-period activity in the macaque posterior parietal cortex. *Cereb*  
743 *Cortex* **24**, 1671-1685, doi:10.1093/cercor/bht031 (2014).
- 744 48 Spaak, E., Watanabe, K., Funahashi, S. & Stokes, M. G. Stable and Dynamic Coding for  
745 Working Memory in Primate Prefrontal Cortex. *J Neurosci* **37**, 6503-6516,  
746 doi:10.1523/JNEUROSCI.3364-16.2017 (2017).
- 747 49 Warden, M. R. & Miller, E. K. Task-dependent changes in short-term memory in the  
748 prefrontal cortex. *J Neurosci* **30**, 15801-15810, doi:10.1523/JNEUROSCI.1569-10.2010  
749 (2010).
- 750 50 Asaad, W. F., Rainer, G. & Miller, E. K. Task-specific neural activity in the primate prefrontal  
751 cortex. *J Neurophysiol* **84**, 451-459 (2000).
- 752 51 Raposo, D., Kaufman, M. T. & Churchland, A. K. A category-free neural population supports  
753 evolving demands during decision-making. *Nat Neurosci* **17**, 1784-1792,  
754 doi:10.1038/nn.3865 (2014).
- 755 52 Wang, X. J. Synaptic basis of cortical persistent activity: the importance of NMDA receptors  
756 to working memory. *J Neurosci* **19**, 9587-9603 (1999).
- 757 53 Mendoza-Halliday, D. & Martinez-Trujillo, J. C. Neuronal population coding of perceived and  
758 memorized visual features in the lateral prefrontal cortex. *Nat Commun* **8**, 15471,  
759 doi:10.1038/ncomms15471 (2017).

- 760 54 Kim, S., Hwang, J. & Lee, D. Prefrontal coding of temporally discounted values during  
761 intertemporal choice. *Neuron* **59**, 161-172, doi:10.1016/j.neuron.2008.05.010 (2008).
- 762 55 Amiez, C., Joseph, J. P. & Procyk, E. Reward encoding in the monkey anterior cingulate  
763 cortex. *Cereb Cortex* **16**, 1040-1055, doi:10.1093/cercor/bhj046 (2006).
- 764 56 Strait, C. E., Blanchard, T. C. & Hayden, B. Y. Reward value comparison via mutual inhibition  
765 in ventromedial prefrontal cortex. *Neuron* **82**, 1357-1366, doi:10.1016/j.neuron.2014.04.032  
766 (2014).
- 767 57 Rudebeck, P. H., Mitz, A. R., Chacko, R. V. & Murray, E. A. Effects of amygdala lesions on  
768 reward-value coding in orbital and medial prefrontal cortex. *Neuron* **80**, 1519-1531,  
769 doi:10.1016/j.neuron.2013.09.036 (2013).
- 770 58 Padoa-Schioppa, C. Neurobiology of economic choice: a good-based model. *Annu Rev*  
771 *Neurosci* **34**, 333-359, doi:10.1146/annurev-neuro-061010-113648 (2011).
- 772 59 Rich, E. L. & Wallis, J. D. Decoding subjective decisions from orbitofrontal cortex. *Nat*  
773 *Neurosci* **19**, 973-980, doi:10.1038/nn.4320 (2016).
- 774 60 Enel, P., Procyk, E., Quilodran, R. & Dominey, P. F. Reservoir Computing Properties of Neural  
775 Dynamics in Prefrontal Cortex. *PLoS Comput Biol* **12**, e1004967,  
776 doi:10.1371/journal.pcbi.1004967 (2016).
- 777 61 Buckley, M. J. *et al.* Dissociable components of rule-guided behavior depend on distinct  
778 medial and prefrontal regions. *Science* **325**, 52-58, doi:10.1126/science.1172377 (2009).
- 779 62 Chafee, M. V. & Goldman-Rakic, P. S. Matching patterns of activity in primate prefrontal area  
780 8a and parietal area 7ip neurons during a spatial working memory task. *J Neurophysiol* **79**,  
781 2919-2940 (1998).
- 782 63 Gnadt, J. W. & Andersen, R. A. Memory related motor planning activity in posterior parietal  
783 cortex of macaque. *Exp Brain Res* **70**, 216-220 (1988).
- 784 64 Constantinidis, C. & Steinmetz, M. A. Neuronal activity in posterior parietal area 7a during  
785 the delay periods of a spatial memory task. *J Neurophysiol* **76**, 1352-1355 (1996).
- 786 65 Pu, X., Ma, Y. & Cai, J. A study on the effect of lesions of area 7 of the parietal cortex on the  
787 short-term visual spatial memory of rhesus monkeys (*Macaca mulatta*). *Brain Res* **600**, 187-  
788 192 (1993).
- 789 66 Chafee, M. V. & Goldman-Rakic, P. S. Inactivation of parietal and prefrontal cortex reveals  
790 interdependence of neural activity during memory-guided saccades. *J Neurophysiol* **83**,  
791 1550-1566 (2000).
- 792 67 Konecky, R. O., Smith, M. A. & Olson, C. R. Monkey prefrontal neurons during Sternberg task  
793 performance: full contents of working memory or most recent item? *J Neurophysiol* **117**,  
794 2269-2281, doi:10.1152/jn.00541.2016 (2017).
- 795 68 Cisek, P. Cortical mechanisms of action selection: the affordance competition hypothesis.  
796 *Philos Trans R Soc Lond B Biol Sci* **362**, 1585-1599, doi:10.1098/rstb.2007.2054 (2007).
- 797 69 Nichols, T. E. & Holmes, A. P. Nonparametric permutation tests for functional neuroimaging:  
798 a primer with examples. *Hum Brain Mapp* **15**, 1-25 (2002).

799

800

801

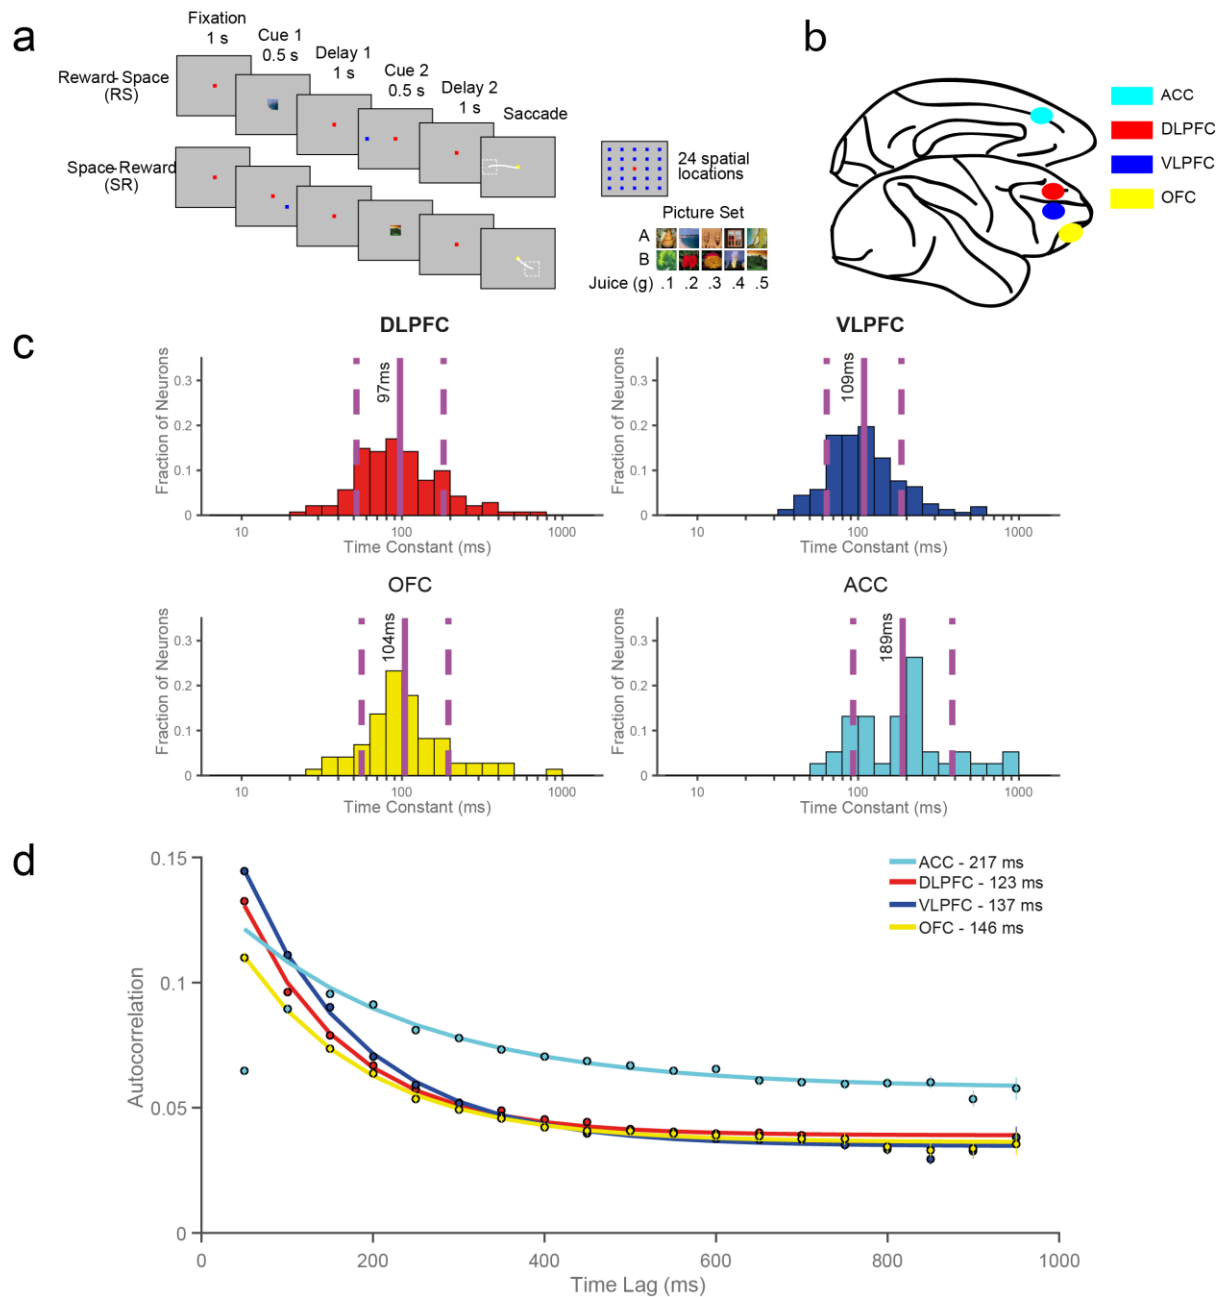

802

803 **Figure 1: Overview of reward-varying spatial working-memory task, recording locations and time constant analysis.**  
 804 **a)** Reward-varying spatial working memory task. Monkeys were trained to remember a spatial position in working memory.  
 805 They were also presented with a cue indicating the reward size they would receive for successfully completing the trial with a  
 806 saccade to the remembered location. On RS (Reward-Space) trials, the reward cue was presented first; whereas on the SR  
 807 (Space-Reward) trials, the cues were presented in the reverse order. On SR trials the reward cue therefore acted as a  
 808 distraction to working memory of the task-relevant spatial information. **b)** Approximate location of neural recordings. Neurons  
 809 were recorded from anterior cingulate cortex (ACC), dorsolateral prefrontal cortex (DLPFC), ventrolateral prefrontal cortex  
 810 (VLPFC), and orbitofrontal cortex (OFC). **c)** Histograms of the single-neuron time constants within the four PFC brain regions.  
 811 Time constants are highly variable across neurons. Solid and dashed vertical lines represent mean(Log( $\tau$ )) and  
 812  $\pm$  SD(Log( $\tau$ )) respectively. **d)** Population-level time constants of firing rate autocorrelation in DLPFC, VLPFC, OFC and ACC  
 813 during pre-stimulus fixation epoch. Time constant captures the rate of decay of autocorrelation over time. ACC had the highest  
 814 and most distinct time constant of all PFC regions studied.

815

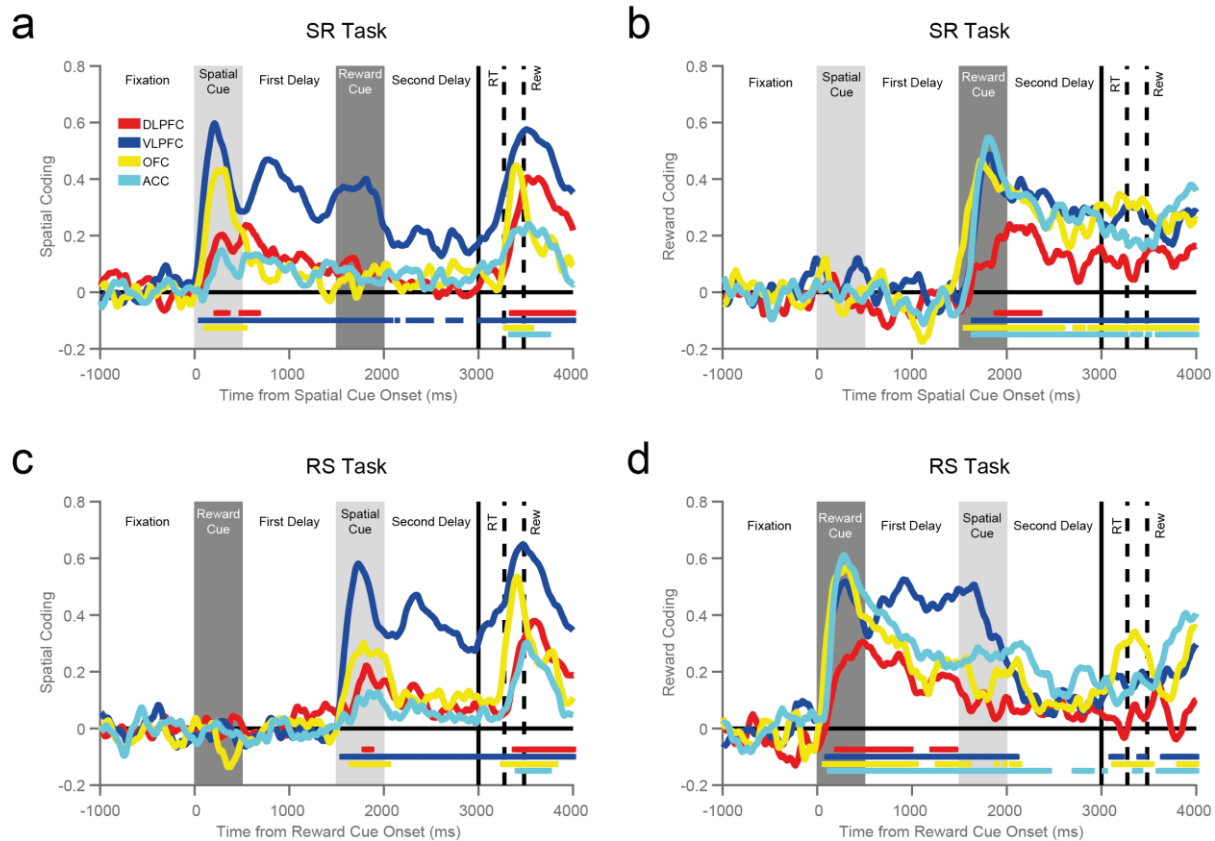

816

817 **Figure 2: Ventrolateral prefrontal neurons maintain information for both spatial and reward stimuli during delay**  
818 **epochs.** The coding of each task feature (spatial location, **a** and **c**; reward level, **b** and **d**) are plotted for each brain area and  
819 trial type (SR-task, **a** and **b**; RS-task, **c** and **d**). Ventrolateral prefrontal cortex (VLPFC) is the only region to strongly code  
820 information about space and reward across the trial. Notably, the VLPFC activity primarily encodes the factor most recently  
821 presented. When the reward cue is shown first (RS task, **c** and **d**), a representation of reward size is maintained throughout the  
822 first delay, but falls away when the spatial cue is presented. More surprisingly, a similar weakening of spatial coding is also  
823 observed on the SR Task (**a**), even though this analysis is restricted to trials where the subject remembered the correct spatial  
824 location. Therefore, the maintenance of a strong population code for spatial location within this epoch does not seem essential  
825 for working memory. The VLPFC population strongly encodes and maintains a representation of the remembered spatial  
826 location, but this is substantially weakened by the offset of the reward cue. The first solid vertical line signifies when subjects  
827 were cued to respond. The first and second dashed vertical lines represent the average timing of the subjects' saccade and the  
828 onset of reward respectively. Coloured horizontal lines represent significant encoding for the corresponding brain region  
829 (Cluster-based permutation test,  $p < 0.05$ ).

830

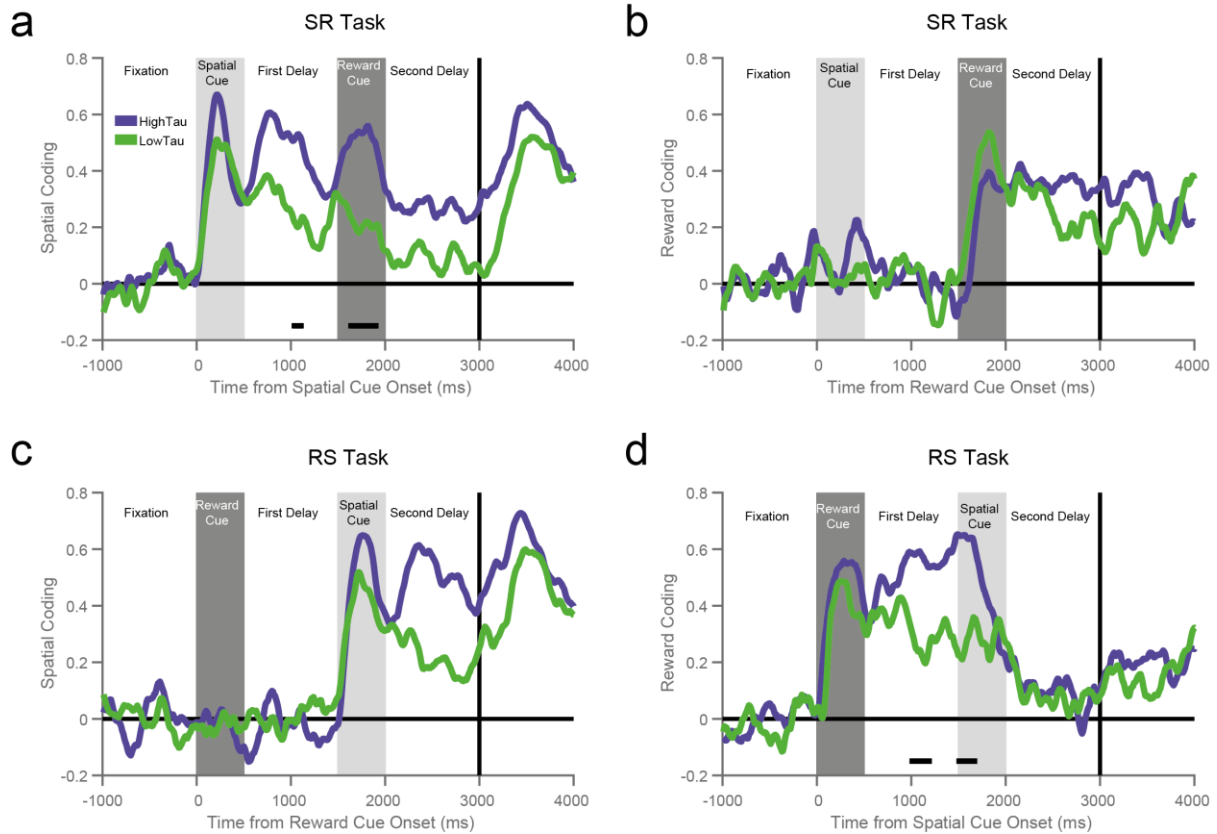

831

832 **Figure 3: Ventrolateral prefrontal neurons with higher resting time constants maintain reward and spatial information**  
833 **across delays.** Coding for space (a and c) and reward size (b and d) is calculated for two subpopulations of ventrolateral  
834 prefrontal cortex (VLPFC) neurons subdivided by resting time constant. The subpopulation with higher time constants has a  
835 stronger representation of remembered spatial location during the first delay of the SR task (a,  $p = 0.0482$ ) and whilst the  
836 reward cue is on screen ( $p = 0.0027$ ). The high time constant population also has a trend towards having stronger spatial  
837 coding in the second delay of the RS task (c,  $p = 0.0639$ ). These neurons code reward more strongly during the first delay of  
838 the RS task (d,  $p = 0.0457$ ) and just as the spatial cue is being presented ( $p = 0.0077$ ). Notably, on SR trials, where the reward  
839 cue is acting as a distractor, the high time constant subpopulation do not exhibit stronger reward coding. They also switch off  
840 reward coding on RS trials as soon as the task-relevant (spatial) cue is presented. Horizontal black bars represent a significant  
841 difference between the high and low time constant subpopulations (Cluster-based permutation test,  $p < 0.05$ ).

842

843

844

845

846

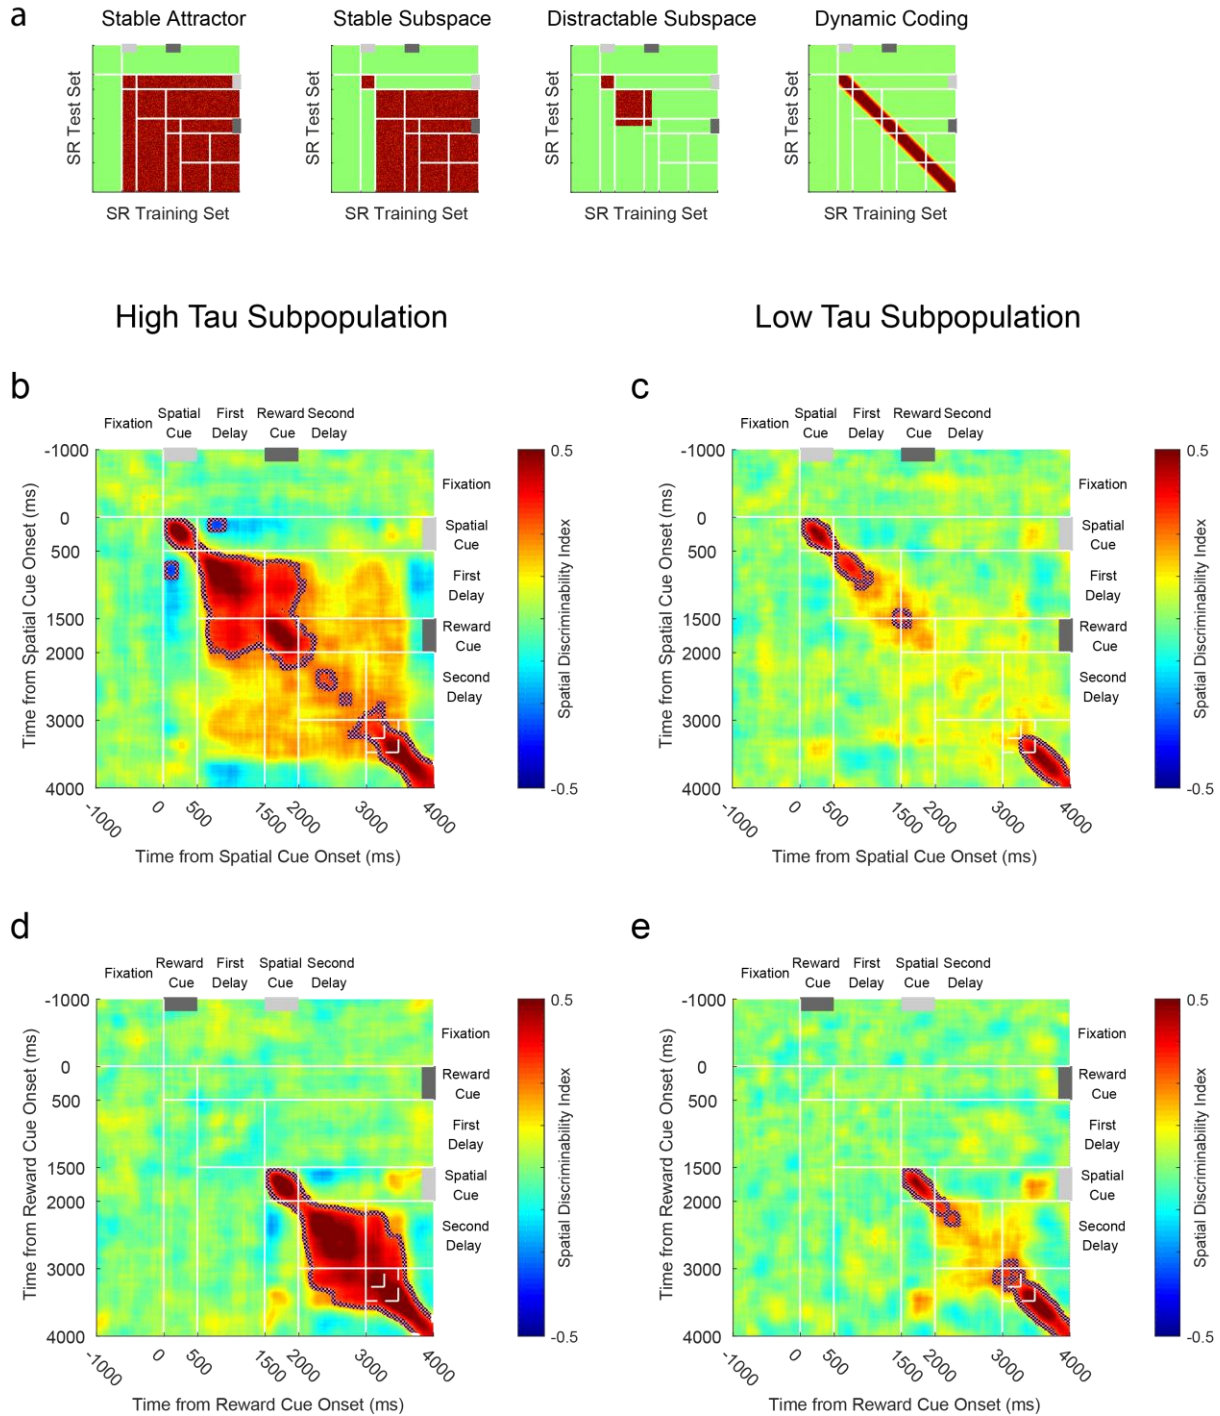

847

848 **Figure 4: Cross-temporal dynamics of spatial selectivity by high and low time constant populations.** **a**) Schematic  
 849 representing cross-temporal dynamics of different working-memory codes on SR trials. Each pixel represents how well spatial  
 850 location can be discriminated when using half of the trials at one timepoint as a training-set (X-Axis), and the other half of trials  
 851 at a separate timepoint as a test-set (Y-Axis). On diagonal, the value is identical to those plotted in Fig3. Off diagonal, the plot  
 852 indicates the stability of any spatial coding across time. In the first exemplar, stable spatial coding is evident across the trial, as  
 853 data from any timepoint after cue presentation can be used to decode the remembered spatial location at any other timepoint.  
 854 The second exemplar is similar, but this stable state is only established following a transient dynamic phase where the cue is  
 855 initially encoded. The third exemplar shows that this stable state is established during the initial delay – but collapses after the  
 856 reward cue is presented. The final exemplar shows that spatial location is coded throughout the trial (heat on the diagonal), but  
 857 that this code is not stable across time. Therefore, the way space is coded at two distinct timepoints is inconsistent. **b-e**) Cross-  
 858 temporal decodability of spatial location is plotted for high (**b, d**) and low (**c, e**) time constant VLPFC populations on SR (**b, c**)  
 859 and RS (**d, e**) trials. The high time constant subpopulation has a much greater stability of its spatial coding: the off-diagonal  
 860 elements are warm, meaning that the same population code persists throughout the delay epoch following the spatial cue.  
 861 Despite this stability, there is a negative correlation between the cue period and the delay indicating a reversal of spatial tuning



862 between these epochs. In SR trials, a stable state is reached during the first delay, but this is disrupted by the presentation of  
863 the reward cue, and there is only a weak non-significant cross-temporal generalisation between the first and second delay. A  
864 dynamic, rather than stable, representation of space returns around the time of the go cue. In the low time constant population,  
865 coding is always dynamic, so no stable state is established. Dotted lines encircling areas of strong coding indicate significant  
866 cross-temporal stability ( $p < 0.05$ , **Methods**).

867

868

869

870

871

872

873

874

875

876

877

878

879

880

881

882

883

884

885

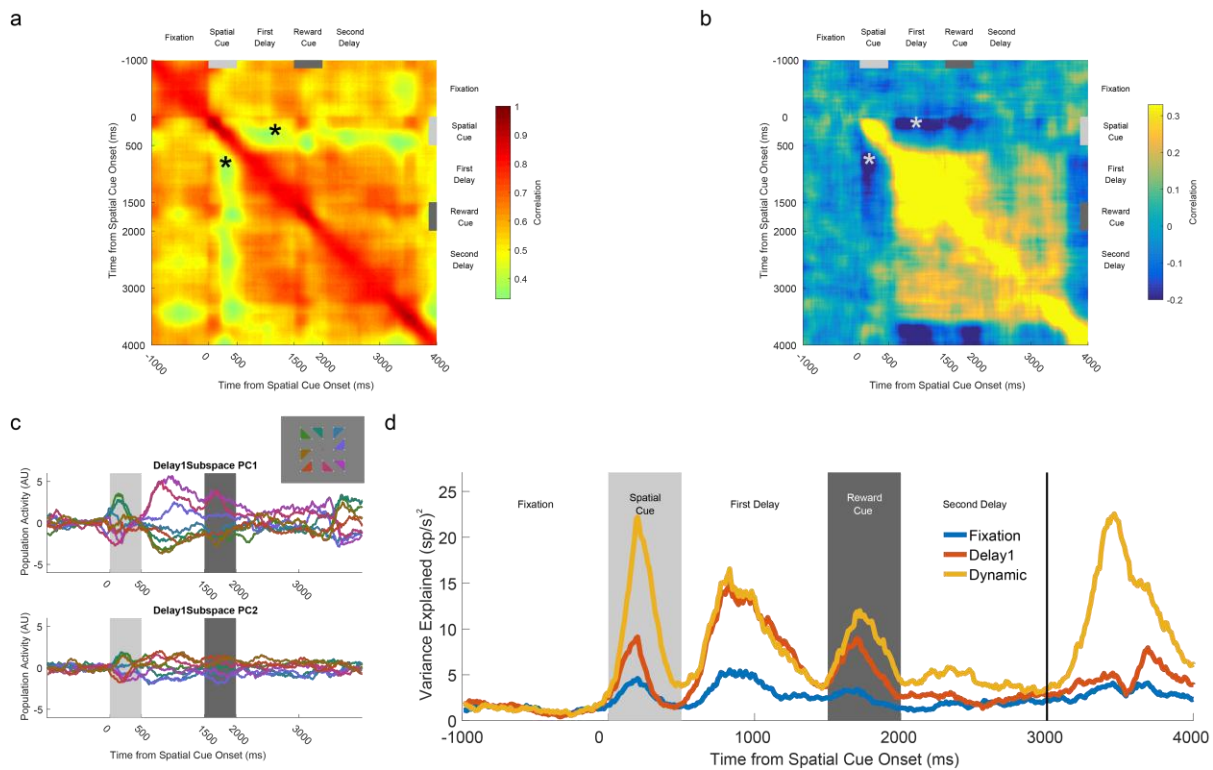

886

887 **Figure 5: VLPFC high time constant population reverses its spatial coding between cue presentation and the**  
888 **subsequent delay. a)** Within-condition correlation of neural firing across time for SR trials. All bins are positively correlated with  
889 each other, suggesting neural firing is stable across time. Note positive correlation between cue period and delay (asterisk). **b)**  
890 Within-condition correlation analysis where activity for each neuron was demeaned across each of the spatial locations. There  
891 now exists a negative correlation between the time of the spatial cue presentation and the first delay (asterisk). **c)** Reversal of  
892 VLPFC high time constant spatial tuning between cue and delay. A mnemonic subspace was defined by time-averaged delay  
893 one activity. The across-trial firing for each condition was projected back onto the first and second principal axes of this  
894 subspace. While the conditions remain well-separated on both principal axes during the first delay, the subspace does not  
895 generalise well into the second delay as activity from the different conditions converges. At the time of the cue, the conditions  
896 appear separable, but in the reverse configuration from that during the delay. The inset shows the geometric location of each  
897 spatial location that appeared on the screen. **d)** The stimulus variance captured by three different subspaces is displayed. The  
898 fixation subspace is defined by time-averaged activity in the 1000ms before cue presentation. This should represent a chance-  
899 level amount of variance explained. The Delay1 subspace is defined by time-averaged activity from 500ms to 1500ms after cue  
900 presentation. The dynamic subspace is defined separately at each individual time point. The dynamic subspace explains a  
901 much greater amount of variance during the cue period, illustrating that there is little consistency in the activity patterns  
902 between cue and delay epochs. However, the Delay1 subspace captures as much variance as the dynamic subspace during  
903 the first delay, suggesting the VLPFC high tau population activity has settled to a stable state by this point.

904

905

906

907

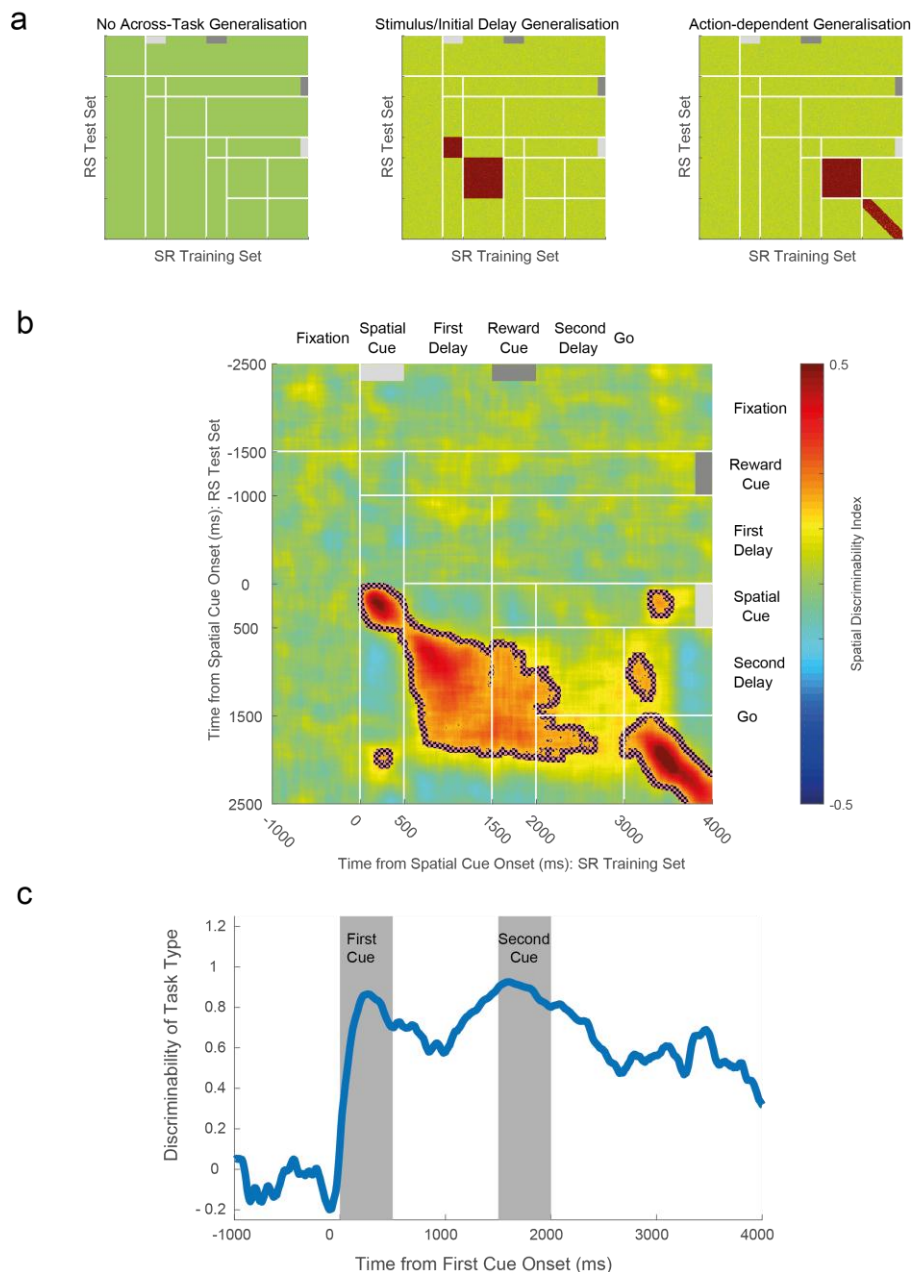

908

909 **Figure 6: Cross-generalizability of working memory across trial types.** By using data from SR trials as a training set for a  
 910 classifier, and data from RS trials as a test set, the generalizability of spatial coding across task types can be studied. **a)**  
 911 Exemplars of how population activity may generalise across trial types. If there is no across-task generalisation, spatial position  
 912 cannot be decoded from neural activity recorded on the other trial type. If there is stimulus-locked generalisation, spatial  
 913 position can be decoded by activity from the other trial type; however, it is relative to cue presentation so the decoding is  
 914 displaced off of the diagonal. If there is action-dependent generalisation, neural activity generalises along the diagonal in the  
 915 second delay and response epochs as subjects prepare and execute their saccade. **b)** Cross-generalizability in VLPFC is  
 916 primarily locked to the presentation of the stimulus. Spatial position cannot be decoded from activity during the second delay  
 917 period, implying distinct population codes on the two trial types in the delay immediately prior to response. Only once the action  
 918 is initiated (at the go cue), does a cross-trial generalisation appear on the diagonal. Dashed lines encircling areas of strong  
 919 coding indicate a significant cross-generalizable stability ( $p < 0.05$ , see Materials and methods). **c)** Decoding task type. The task  
 920 the subjects are performing can be accurately decoded from VLPFC neural activity, throughout the trial. This is particularly  
 921 important during the second delay, as at this point the subject has been exposed to the same visual stimuli, just in reverse  
 922 order.

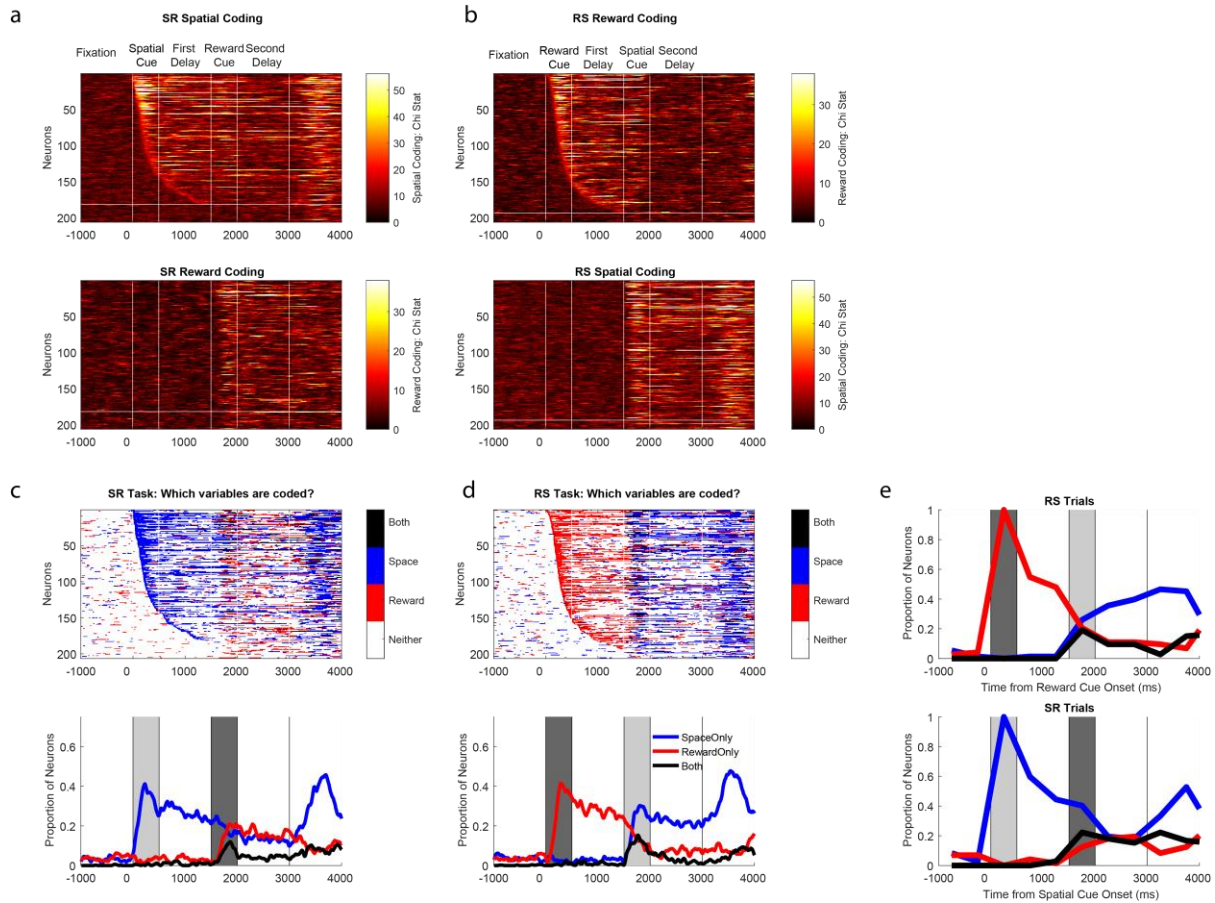

923

924 **Figure 7: Flexibility of single-neuron selectivity.** a) SR Trials: Single neuron coding. The top plot shows the spatial coding of  
 925 individual ventrolateral PFC neurons; each row of the matrix represents single neuron selectivity. Neurons are sorted by their  
 926 latency for spatial encoding; all neurons above the horizontal white line were selective for space either during cue presentation  
 927 or the first delay. For many of these cells, selectivity is transient; few code space across extended periods of the trial.  
 928 Furthermore, a large proportion of these neurons subsequently become selective for reward at cue two/delay two (neurons are  
 929 sorted in the same order in the panel below). b) RS Trials: Single neuron coding. Neurons are now sorted by their latency for  
 930 reward encoding, with all neurons above the white line selective during cue presentation or the first delay. The top panel shows  
 931 reward encoding, which again is primarily transitory in nature. The bottom panel shows that many of the neurons initially coding  
 932 reward go on to code the spatial-location when this cue is presented. Fraction of neurons selective for either or both task  
 933 factors across SR (c) or RS (d) trials. Presentation of the second stimulus reduces the number of neurons selective for the  
 934 initially presented cue. e) Switching of selectivity across a trial. Neurons are included in this analysis if they were selective  
 935 during the presentation of the first cue. The selectivity pattern of these neurons is profiled across time. On SR trials, only a  
 936 minority of cue selective neurons retain an exclusive representation of space across the entire trial; many neurons gain reward  
 937 coding, some at the expense of spatial selectivity, and others in addition to this.

938

939

940

941

942

943

944

945

946

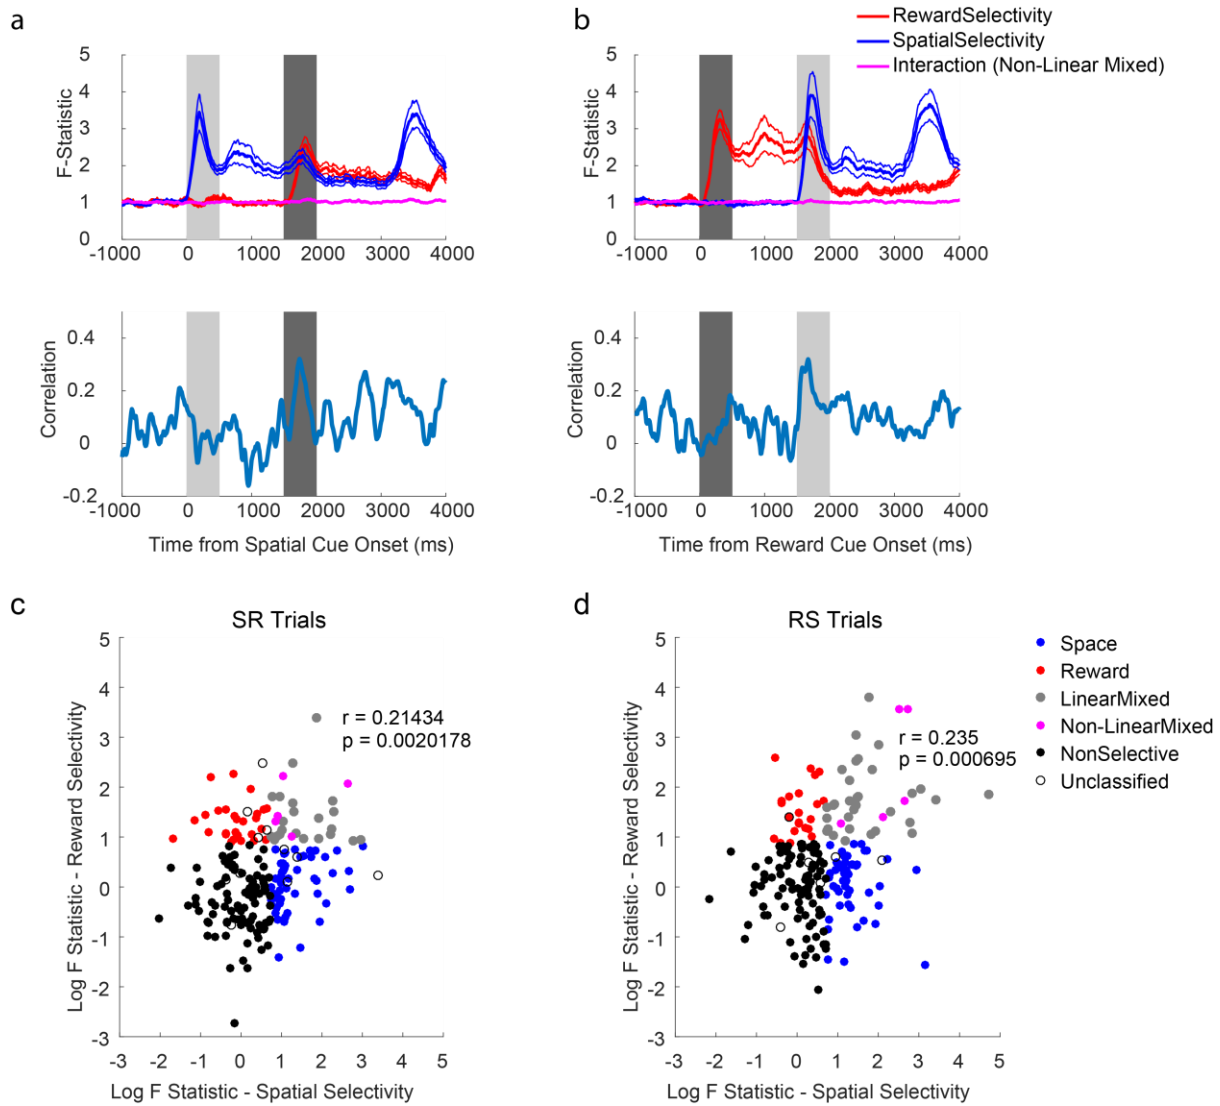

947

948 **Figure 8. Absence of non-linear interactions between reward and spatial selectivity on SR (a) and RS (b) trials.** The  
 949 mean population F-statistics from a sliding 2-way ANOVA with an interaction term are plotted ( $\pm$ SEM; top panel). The  
 950 interaction term between both factors does not change from that during pre-trial fixation. However, when there is a positive  
 951 correlation between reward and spatial selectivity F-statistics at the time of Cue 2 (Bottom panel), indicating linear mixed  
 952 selectivity. Spearman correlation of Spatial and Reward coding F-Statistics during Cue 2 for **c**) SR trials; **d**) RS trials. To  
 953 complement the above analysis, we performed a single spearman correlation between the raw F-statistics from a 2-way  
 954 ANOVA of spike-counts during the second cue. Each dot represents a neuron appropriately coloured. Space and Reward  
 955 neurons were required to have only one significant main effect ( $p < 0.05$ ) and a non-significant interaction ( $p > 0.05$ ). Linear mixed  
 956 neurons were required to have two significant main effects ( $p < 0.05$ ) and a non-significant interaction ( $p > 0.05$ ). Non-linear mixed  
 957 neurons were required to have two significant main effects ( $p < 0.05$ ) and a significant interaction ( $p < 0.05$ ). Non-selective  
 958 neurons had no significant effects ( $p > 0.05$ ). A very small proportion of neurons did not meet these criteria so were unclassified.  
 959 F-statistics have been log-transformed for illustrative purposes.

960

961

962

963

964

965

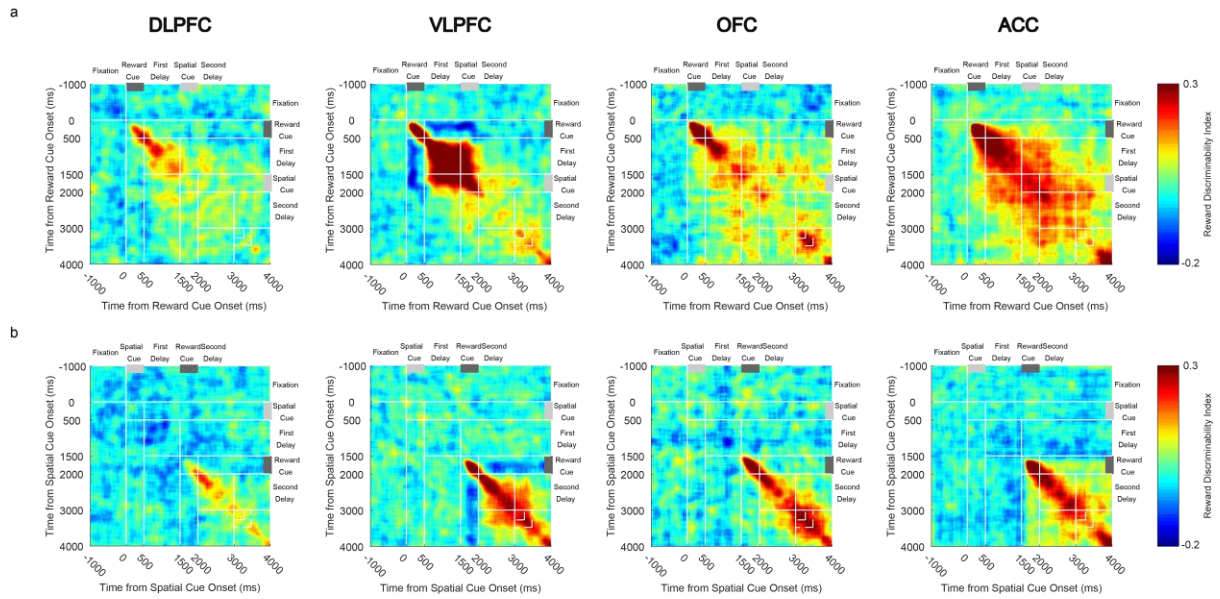

966

967 **Supplementary Figure 1: Cross-temporal dynamics of reward selectivity by brain region and task (a, RS task; b, SR**  
968 **task).** All brain areas studied have neural activity representing reward size. Only VLPFC shows a reversal of reward tuning  
969 between the cue epoch and the subsequent delay. This feature of coding is present on both trial types.

970

971

972

973

974

975

976

977

978

979

980

981

982

983

984

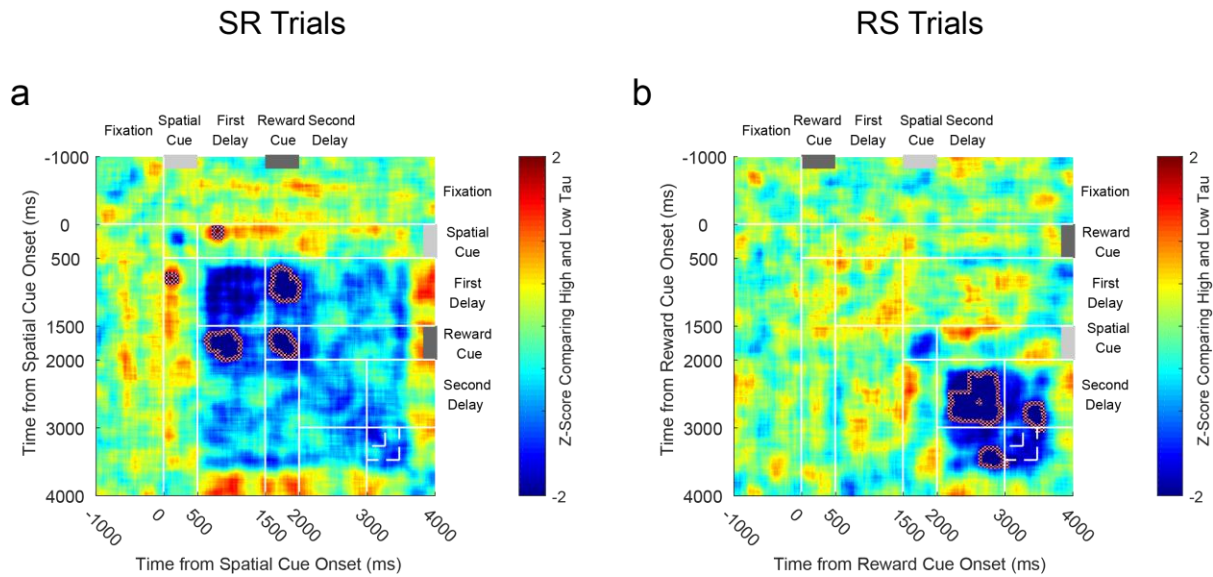

985

986 **Supplementary Figure 2: Comparison of VLPFC High and Low tau cross-temporal spatial coding for a) SR trials; b) RS**  
987 **trials.** Negative z-scores illustrate stronger coding in the high tau population. Coding of spatial location is more stable for the  
988 high tau population between the first delay and the reward cue of SR trials (largest cluster,  $p = 0.0002$ ; cluster based  
989 permutation test, see **Methods**), and during the reward cue of SR trials (largest cluster,  $p = 0.0086$ ; cluster based permutation  
990 test). There is a stronger switch in coding between the spatial cue and the first delay in high tau cells (largest cluster,  $p =$   
991  $0.0079$ ; cluster based permutation test). On RS trials, there is a more stable coding in high tau cells during the second delay  
992 (largest cluster,  $p = 0.0135$ ), as well as between this time and the reward onset (largest cluster,  $p = 0.0120$ ; cluster based  
993 permutation test). Dotted lines encircling areas of strong dissimilarities in coding indicate a significant difference in cross-  
994 temporal stability between high tau and low tau populations ( $p < 0.05$ , see Materials and methods).

995

996

997

998

999

1000

1001

1002

1003

1004

1005

1006

1007

1008

1009

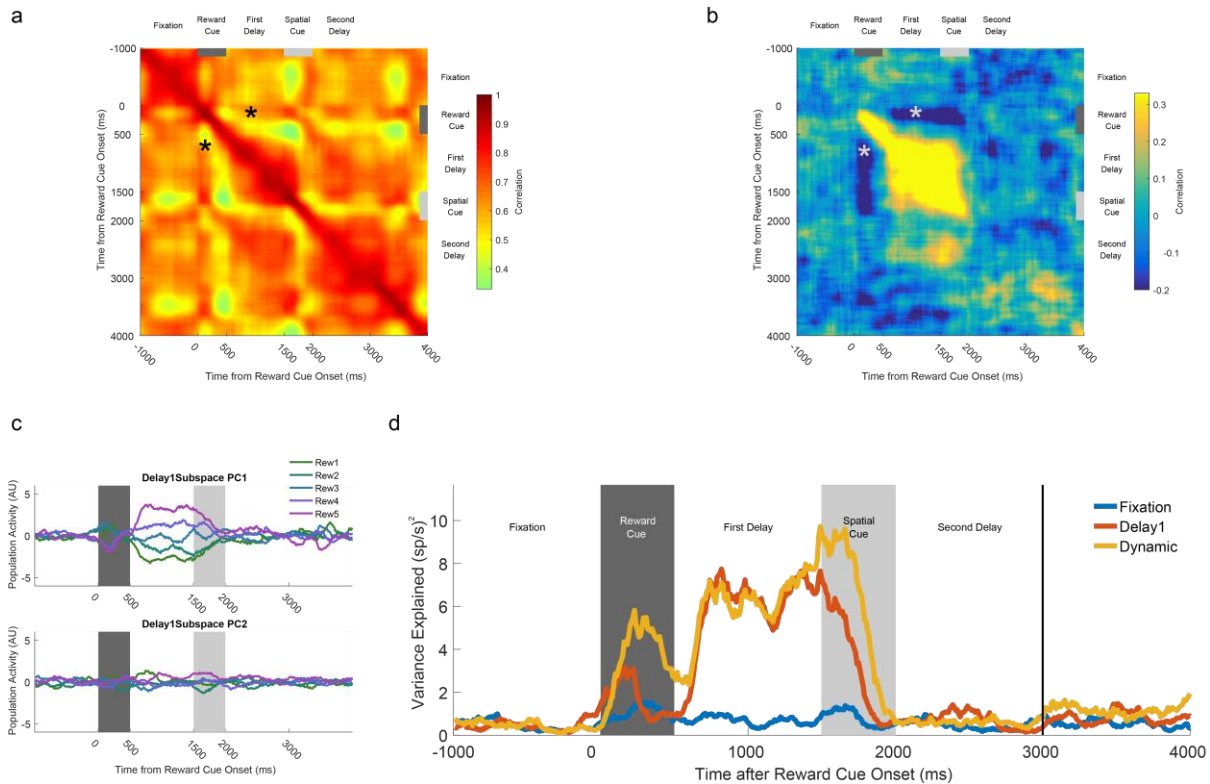

1010

1011 **Supplementary Figure 3: VLPFC high time constant population reverses its reward coding between cue presentation**  
 1012 **and the subsequent delay. a)** Within-condition correlation of neural firing across time for RS trials. All bins are positively  
 1013 correlated with each other, suggesting neural firing is stable across time. Note positive correlation between cue period and  
 1014 delay (asterisk). **b)** Within-condition correlation analysis where activity for each neuron was demeaned across each of the  
 1015 reward sizes. There now exists a negative correlation between the time of the reward cue presentation and the first delay  
 1016 (asterisk). **c)** Reversal of VLPFC high time constant reward tuning between cue and delay. A mnemonic subspace was defined  
 1017 by time-averaged delay one activity. The across-trial firing for each condition was projected back onto the first and second  
 1018 principal axes of this subspace. While the conditions remain well-separated on the first principal axis during the first delay, the  
 1019 subspace does not generalise well into the second delay as activity from the different conditions converges. At the time of the  
 1020 cue, the conditions appear separable, but in the reverse configuration from that during the delay. **d)** The stimulus variance  
 1021 captured by three different subspaces is displayed. The fixation subspace is defined by time-averaged activity in the 1000ms  
 1022 before cue presentation. This should represent a chance-level amount of variance explained. The Delay1 subspace is defined  
 1023 by time-averaged activity from 500ms to 1500ms after cue presentation. The dynamic subspace is defined separately at each  
 1024 individual time point. The dynamic subspace explains a much greater amount of variance during the cue period, illustrating that  
 1025 there is little consistency in the activity patterns between cue and delay epochs. However, the Delay1 subspace captures as  
 1026 much variance as the dynamic subspace during the first delay, suggesting the VLPFC high tau population activity has settled to  
 1027 a stable code by this point.

1028

1029

1030

1031

1032

1033
